1 **CD38 is a key regulator of enhanced NK cell immune responses during pregnancy through its role in**  
2 **immune synapse formation**

3

4 **Authors**

5 Mathieu Le Gars<sup>1,2,\*</sup>, Christof Seiler<sup>3</sup>, Alexander W. Kay<sup>4</sup>, Nicholas L. Bayless<sup>2</sup>, Elina Starosvetsky<sup>5</sup>,  
6 Lindsay Moore<sup>5</sup>, Shai S. Shen-Orr<sup>5</sup>, Natali Aziz<sup>6</sup>, Purvesh Khatri<sup>1</sup>, Cornelia L. Dekker<sup>3</sup>, Gary E. Swan<sup>6</sup>,  
7 Mark M. Davis<sup>7,8</sup>, Susan Holmes<sup>4</sup>, Catherine A. Blish<sup>1,2,9,\*</sup>

8

9 Departments of <sup>1</sup>Medicine, <sup>4</sup>Pediatrics, <sup>6</sup>Obstetrics & Gynecology, <sup>7</sup>Microbiology & Immunology, <sup>2</sup>Stanford  
10 Immunology Program, <sup>6</sup>Stanford Prevention Research Center, Stanford University School of Medicine,  
11 <sup>3</sup>Department of Statistics, Stanford University, Palo Alto, California; <sup>5</sup>Faculty of Medicine, Technion - Israel  
12 Institute of Technology, Israel; <sup>8</sup>Howard Hughes Medical Institute, <sup>9</sup>Chan Zuckerberg Biohub, San  
13 Francisco, California.

14

15 \*Corresponding authors: Mathieu Le Gars, [mlegars@stanford.edu](mailto:mlegars@stanford.edu) and Catherine Blish,  
16 [cblish@stanford.edu](mailto:cblish@stanford.edu)

17

18 **Once sentence summary:** CD38 is responsible for the enhanced immune responses of NK cells to influenza  
19 virus infection during pregnancy through immune synapse formation.

20

21 **Abstract**

22 Pregnant women are particularly susceptible to complications of influenza A virus infection, which may  
23 result from pregnancy-induced changes in the function of immune cells, including natural killer (NK) cells.  
24 To decipher mechanisms driving enhanced NK cell activity during pregnancy, we profiled NK cells from  
25 pregnant and non-pregnant women, which showed significantly increased CD38 expression during

26 pregnancy. CD38 expression defines a phenotypically distinct and mature subset of NK cells that display  
27 increased ability to secrete IFN- $\gamma$  and to kill influenza-infected and tumor cells. This enhanced function is  
28 based on the ability of CD38 to promote the formation of the NK cell immune synapse. Thus, increased  
29 CD38 expression directly promotes enhanced NK cell responses during pregnancy through its role in  
30 immune synapse formation. These findings open new avenues in immunotherapeutic development for  
31 cancer and viruses by revealing a critical role for CD38 in the formation of the NK cell immune synapse.

## 32 **Main text**

### 33 **Introduction**

34 Pregnant women are at high-risk of complications from seasonal and pandemic influenza infections (1, 2).  
35 During the 2009 H1N1 influenza virus pandemic, pregnant women in the United States suffered a  
36 disproportionately high mortality rate, accounting for 5% of deaths while representing only 1% of the total  
37 population (3). The majority of pregnant women who died of influenza-related illness during the pandemic  
38 were infected in the second and third trimesters of pregnancy (4). Influenza infection during second or third  
39 trimester of pregnancy is also associated with significant increases in miscarriages, stillbirths, and early  
40 neonatal diseases and death (1, 5). However, the mechanisms behind this susceptibility to influenza  
41 infection during pregnancy are still poorly understood.

42

43 During pregnancy, the immune system has to finely balance its activity in order to tolerate semi-allogenic  
44 fetal antigens, while maintaining the ability to fight microbial challenges (6-9). These immune alterations  
45 may be at least partially responsible for the increased susceptibility of pregnant women to influenza virus  
46 (10, 11). Recent studies have demonstrated enhanced responses to influenza virus by several innate immune  
47 cell subsets, including monocytes, dendritic cells and natural killer (NK) cells (8, 12-16). In particular, NK  
48 cells play a critical role in virus clearance and regulation of the subsequent adaptive immune response to  
49 influenza virus (17, 18). NK cells express an array of inhibitory receptors, including the killer-cell  
50 immunoglobulin-like receptors (KIRs) and the heterodimer NKG2A-CD94, and activating receptors,  
51 including NKp46, NKp30 and NKG2D, which together define their degree of maturation and  
52 responsiveness to stimuli (19, 20). The expression of these receptors enables NK cells to sense altered cells,  
53 including virus-infected and cancerous cells (21-23). In response to such threats, NK cells can produce  
54 cytokines, such as IFN- $\gamma$ , which limits viral replication and tumor proliferation, and kill cells via release of  
55 cytolytic molecules or through engagement of death receptors. NK cell activation must be tightly regulated  
56 to limit tissue damage at the site of infection. The mechanisms by which NK cell activity is altered during

57 pregnancy are unknown but are particularly critical to balance protection from infection with the avoidance  
58 of a hyperinflammatory reaction that could cause irreversible injuries to the mother and the fetus.  
59  
60 The goal of our study was to identify pregnancy-mediated changes in NK cells and their impact on the  
61 immune response to influenza infection. Our prior study reported that NK cell responses to influenza virus-  
62 infected cells were enhanced during pregnancy (12). This finding may at least in part reflect the fact that  
63 virus infections were performed in bulk peripheral blood mononuclear cell (PBMC) cultures, where  
64 enhanced cytokine responses from monocytes and dendritic cells could have contributed to dramatic NK  
65 cell activation (13, 21). In fact, NK cells from pregnant women stimulated directly with phorbol-myristate  
66 acetate and ionomycin in our experiments, or with IL-12/IL-15 by Kraus et al. (15), have suppressed  
67 responses compared to those of non-pregnant women. In this study, we aim to resolve these contradictory  
68 findings by determining the mechanisms behind changes in cell-intrinsic NK cell function during  
69 pregnancy. To do so, we used mass cytometry paired with logistic regression to predict pregnancy-related  
70 changes in NK cells between pregnant and non-pregnant women in two independent cohorts. We performed  
71 functional assays to define the role of specific NK cell receptors in the responsiveness to influenza-infected  
72 cells, uncovering a surprising new role for the cell surface molecule CD38 in the formation of the immune  
73 synapse that is required for NK cell cytotoxic activity. We then explored whether this phenomenon extended  
74 beyond the setting of influenza-infected cells and discovered that CD38 also promotes immune synapse  
75 formation between NK cells and cancer cells, potentially presenting new therapeutic targets in cancer and  
76 infectious diseases.

## 77 **Results**

### 78 *NK cell immune response to influenza virus and cancer cells during pregnancy.*

79 To investigate how pregnancy alters NK cell phenotype and function, we recruited two cohorts of pregnant  
80 and non-pregnant (control) women in subsequent years (Tables S1 and S2 for cohort 1 and 2 demographics).  
81 Pregnant women were enrolled in their second or third trimesters, and blood samples were collected at  
82 enrollment and 6 weeks postpartum. To investigate intrinsic NK cell function during pregnancy, NK cells  
83 and autologous monocytes were sorted from the PBMCs of controls (n=10), pregnant women (n=10), and  
84 postpartum women (n=10) from cohort 1 (Fig. 1A, experimental workflow). Monocytes were infected with  
85 2009 pandemic H1N1 influenza virus strain and then co-cultured with the autologous NK cells before  
86 functional assessment by flow cytometry. We observed that the frequency of NK cells expressing CD107a  
87 as a marker of cytolytic activity (Fig. 1B) and IFN- $\gamma$  production (Fig. 1C) was significantly greater in  
88 pregnant women than in controls or in postpartum women. These data confirm our earlier findings that  
89 influenza-specific NK cell responses are enhanced during pregnancy (12). However, monocytes  
90 demonstrate enhanced anti-influenza responses during pregnancy, which could activate NK cells through  
91 inflammatory cytokine production (13). We hypothesized that if NK cell function was intrinsically elevated  
92 during pregnancy, we should observe enhanced anti-tumor responses as well. We therefore exposed sorted  
93 NK cells from controls and pregnant women to the K562 tumor cell line (Fig. 1A), which represents a  
94 homogenous, identical target for NK cells from controls and pregnant women. NK cells from pregnant  
95 women demonstrated significantly greater CD107a expression and tumor cell killing than NK cells from  
96 non-pregnant women (Fig. 1, D and E). Interestingly, though tumor killing activity was enhanced during  
97 pregnancy, there were no significant differences in the frequency of IFN- $\gamma$ -producing NK cells (Fig. 1F),  
98 possibly reflective of the lack of inflammatory cytokine production by these tumor targets. These data  
99 indicate that NK cells have an intrinsically enhanced ability to kill both infected and tumor targets during  
100 pregnancy.

101

102 *Deep profiling of NK cell phenotype from healthy pregnant and non-pregnant women*

103 To understand potential drivers of this enhanced NK cell function during pregnancy, we next profiled the  
104 expression patterns of inhibitory and activating surface receptors on NK cells in control non-pregnant  
105 women, pregnant women, and postpartum women. PBMCs from women in both cohorts were evaluated by  
106 mass cytometry as outlined in Fig. 2A and Tables S3 and S4 (antibody panels for cohort 1 and 2,  
107 respectively). NK cells were identified as CD3<sup>-</sup>CD19<sup>-</sup>CD20<sup>-</sup>CD14<sup>-</sup>CD56<sup>+/+</sup>CD16<sup>+/+</sup> cells (Fig. S1A). The  
108 frequency of NK cells did not significantly differ between pregnant and control women, nor in pregnant vs.  
109 postpartum women in either cohort (Fig. S1, B and C). To identify NK cell markers predictive of pregnancy,  
110 we used a generalized linear model (GLM) with bootstrap resampling to account for correlations between  
111 cells and inter-individual variability (Figure 2A, and Materials and Methods). This method was selected  
112 because markers expressed on cells from the same subject are usually more highly correlated than marker  
113 expression patterns between subjects. Thus, accounting for correlated data reduces the number of false  
114 positives.

115 In both cohorts, the expression of CD38 was significantly predictive of pregnant vs. non-pregnant  
116 women (Fig. 2, B and C). CD38 also strongly predicted pregnancy in a paired comparison within women  
117 between their pregnant and post-partum time points (Fig. 2, D and E). To confirm these results, CD38  
118 expression on NK cells was assessed by manual gating, revealing that NK cells from pregnant women  
119 express significantly more CD38 than NK cells from non-pregnant or postpartum women (Fig. S2, A to F).  
120 Several other markers, including PD-1, CD27, CD94, LILRB1, NKp46, NKp44, NKG2A, and CD244,  
121 were predictive of pregnancy in one of the cohorts or analyses (Fig. 2, B to E). Manual gating analyses  
122 similarly confirmed enhanced expression of several of these markers within individual cohorts and  
123 comparisons, yet none of the markers was consistently predictive of pregnancy across cohorts or analyses  
124 (Fig. S3 to S7). As CD38 was the only marker consistently predictive of pregnancy across both cohorts and  
125 all analyses, we elected to explore how its enhanced expression during pregnancy might alter NK cell  
126 function.

127

128 *CD38 expression on NK cells correlates with the magnitude of the influenza-specific immune response*  
129 We assessed CD38 expression by conventional flow cytometry on NK cells during their response to  
130 influenza-infected cells as outlined in Fig. 1A. Consistent with our mass cytometry results, the frequency  
131 of CD38-expressing NK cells as well as the intensity of CD38 expression on NK cells was significantly  
132 greater in pregnant women compared to controls or postpartum women (Fig. 3, A and B). Further, CD38  
133 expression was significantly correlated with the magnitude of the NK cell response as measured by CD107a  
134 expression (Fig. 3C) and IFN- $\gamma$  production (Fig. 3D). This raises the possibility that the increased responses  
135 in pregnant women are driven primarily by their enhanced CD38 expression. We therefore evaluated the  
136 function of CD38<sup>-</sup> vs. CD38<sup>+</sup> NK cells. Regardless of pregnancy status, CD38-expressing NK cells  
137 displayed a higher CD107a and IFN- $\gamma$  expression compared to CD38<sup>-</sup> NK cells (Fig. 3, E and F). These data  
138 are consistent with the idea that expansion of a highly functional subset of NK cell expressing CD38 is  
139 responsible for the enhanced influenza-specific NK cell responses during pregnancy.

140 To further confirm that CD38 expression is associated with enhanced NK cell responses to influenza  
141 regardless of pregnancy status, we used NK cells from healthy blood bank donors to compare the ability of  
142 CD38<sup>-</sup> versus total NK cells to respond to pH1N1-infected monocytes. We elected to compare CD38<sup>-</sup> NK  
143 cells to total NK cells (of which 45-95% express CD38, Fig. S2) rather than to sort on CD38 because its  
144 ligation could alter NK cell function. Total NK cells displayed significantly greater CD107a and IFN- $\gamma$   
145 responses to autologous influenza-infected monocytes than did CD38<sup>-</sup> NK cells (Fig. 3, G and H).  
146 Moreover, the frequency of dead monocytes was significantly increased after co-culture with total NK cells  
147 compared to CD38<sup>-</sup> NK cells, suggesting that CD38<sup>+</sup> NK cells are enhanced in killing activity (Fig. 3I).  
148 These data confirm that CD38<sup>+</sup> NK cells have increased responses to influenza-infected cells.

149

150 *Profiling CD38<sup>-</sup> and CD38<sup>+</sup> NK cells.*

151 To better understand the mechanisms driving enhanced function of CD38-expressing NK cells, we  
152 examined the phenotype of CD38<sup>+</sup> NK cells. We used GLM with bootstrap resampling to evaluate markers

153 predictive of CD38<sup>+</sup> vs. CD38<sup>-</sup> NK cells (Fig. 4A, for cohort 2 and fig. S8A, for cohort 1), which differed  
154 in the specific NK cell markers examined (Fig. 2A). As CD38 expression was associated with enhanced  
155 responsiveness in all subjects regardless of pregnancy status, we examined NK cells from both pregnant  
156 and control women together. We observed that CD38 expression marked a unique phenotype of NK cells  
157 in cohort 2 (Fig. 4A). Specifically, several activating (CD244 (2B4), CD11b, CD57, NKp30 and NKp46)  
158 and inhibitory (KIR2DL1, KIR2DL2/L3/S2, KIR3DL1, KIR3DL2 and LILRB1) receptors were  
159 significantly predictive of CD38<sup>+</sup> NK cells. CD38<sup>-</sup> NK cells were more likely to express CD94, CD27, and  
160 KIR2DL1. A similar analysis of cohort 1 confirmed the increased expression of CD57, NKp30 and NKp46  
161 in CD38<sup>+</sup> NK cells compared to CD38<sup>-</sup> NK cells (Fig. S8A). Expression of perforin, which was not included  
162 in the panel to evaluate cohort 2, was significantly increased on CD38<sup>+</sup> NK cells (Fig. S8A). Manual gating  
163 to examine the frequency of NK cells expressing specific receptors, as well as their mean signal intensity,  
164 confirmed these results (Fig. 4, B and C). Similar results were obtained when the control and pregnant  
165 women were evaluated independently (Fig. S9, A and B). Overall, the increased expression of several KIRs,  
166 NKp30, NKp46, CD57, CD11b, and perforin suggest that CD38<sup>+</sup> NK cells are a mature subset with high  
167 cytotoxic potential.

168

169 *CD38 plays a direct role in NK cell immune response to influenza infection.*

170 The mature phenotype of CD38-expressing NK cells could explain their enhanced responsiveness if CD38  
171 marks cells with greater functional potential. Yet it is also possible that CD38 plays a direct role in the NK  
172 cell immune response to influenza-infected cells. CD38 has two known functions, neither of which have  
173 been studied in antiviral or antitumoral NK cell function. First, it is an extracellular ectoenzyme that can  
174 drive intracellular calcium flux through i) catalyzing the synthesis of cyclic Adenosyl-di-phosphate ribose  
175 from Nicotinamide Adenine Dinucleotide<sup>+</sup> or ii) catalyzing the hydrolysis of cyclic Adenosyl-di-phosphate  
176 ribose into Adenosyl-di-phosphate ribose (22, 23). Second, it is an adhesion molecule that binds to CD31  
177 and likely other ligands (24, 25). We therefore used an inhibitor of CD38 enzymatic activity, kuromanin,



178 to assess the role of CD38 enzymatic activity in the NK cell response to influenza-infected monocytes. We  
179 observed no significant differences in CD107a or IFN- $\gamma$  responses in the presence or absence of this  
180 inhibitor at concentrations known to inhibit CD38 function in T cells (26) (Fig. S10, A and B). Thus, the  
181 enzymatic activity of CD38 does not appear to play a role in altering influenza-specific NK cell responses.

182 As monocytes express CD31 (Fig. S10C), we used CD38 and CD31 blocking antibodies to assess  
183 the role of CD38-CD31 interactions in the immune response to influenza. The addition of CD38 blocking  
184 antibodies significantly inhibited NK cell CD107a and IFN- $\gamma$  responses (Fig. 5, A and B). Further, blocking  
185 CD38 diminished the frequency of dead monocytes, suggesting that NK cell killing is diminished (Fig. 5C).  
186 Blocking the CD38 ligand, CD31, also significantly abrogated NK cell CD107a and IFN- $\gamma$  responses  
187 compared to the incubation with an isotype control antibody. These data indicate that CD38, in addition to  
188 marking a mature subset of NK cells, plays a direct role in NK cell responses to influenza, likely by the  
189 binding to its ligand, CD31.

190

191 *CD38 is crucial to the establishment of immune synapse with influenza-infected cells.*

192 We next investigated whether CD38-CD31 interactions might play a role in the formation of the immune  
193 synapse between the NK cell and the infected cell. We therefore examined whether CD38-CD31  
194 interactions contributed to the ability of NK cells to make conjugates with influenza-infected monocytes.  
195 Conjugation between fluorophore-labelled NK cells and monocytes were assessed by flow cytometry (Fig.  
196 5D and fig. S11). In presence of blocking antibodies to both CD38 and LFA-1 (which was used as a positive  
197 control), we observed a significant reduction in the formation of NK cell-monocyte conjugates compared  
198 to untreated cells or isotype control antibody-treated cells. This suggests that CD38 plays a role in immune  
199 synapse formation. To confirm this, using confocal microscopy, we observed that CD38 is co-localized  
200 with the adhesion molecule LFA-1 in the contact zone between NK cells and H1N1-infected monocytes  
201 (Fig. 5, E and F). Minimal accumulation of CD38 was observed when NK cells were in contact with mock-  
202 infected monocytes (Fig. 5, E and F). In presence of a blocking CD38 or CD31 antibody, the formation of

203 the immune synapse was strongly and significantly inhibited compared to non-treated cells or cells  
204 incubated with an isotype control antibody (Fig. 5, G and H). Similarly, immune synapse formation was  
205 rarely observed between H1N1-infected cells and CD38<sup>-</sup> NK cells. As a positive control, blocking LFA-1  
206 also led to a significant decrease in the immune synapse formation between NK cells and pH1N1-infected  
207 monocytes compared to non-treated cells or cells treated with an isotype control antibody (Fig. 5, G and  
208 H). Together, these data indicate that CD38 contributes to the establishment of the immune synapse between  
209 NK cells and influenza-infected cells, which is pivotal for NK cell immune response.

210

211 *CD38 contributes to immune synapse formation between NK cells and cancer cells.*

212 To explore whether the role of CD38 in NK cell responses extends beyond the response to influenza-  
213 infected cells, we examined NK cell responses to K562 tumor cells. We exposed total or CD38<sup>-</sup> NK cells  
214 from healthy donors to K562 cancer cells in the presence of CD38 or CD31 blocking antibodies. Total NK  
215 cells had significantly greater CD107a responses than did CD38<sup>-</sup> NK cells and resulted in higher levels of  
216 tumor cell killing (Fig. 6, A and B). Blocking CD38 significantly diminished NK cell CD107a expression  
217 and tumor cell killing (Fig. 6, A and B). The frequency of IFN- $\gamma$ <sup>+</sup> cells did not significantly differ between  
218 CD38<sup>-</sup> and total NK cells, and blocking CD38 and CD31 did not significantly alter the frequency of IFN- $\gamma$ <sup>+</sup>  
219 NK cells responding to tumor targets (Fig. 6C). Blocking CD31 had no significant effect on CD107a  
220 expression, K562 cell death, or IFN- $\gamma$  production, suggesting that an alternate ligand may be used. Thus,  
221 these data indicate that CD38 also plays a critical role in NK cell cytolytic responses to cancer cells. To  
222 demonstrate the direct role of CD38 in NK cell anti-tumor responses, we assessed NK cell-K562 cell  
223 conjugate formation, and found that blocking CD38 or LFA-1 (positive control) significantly diminished  
224 conjugate formation compared to isotype control or without antibody (Fig. 6D). Finally, we visualized  
225 CD38 in the formation of immune synapses between NK cells and K562 tumor cells. As depicted in Fig. 6,  
226 E and F, CD38 polarizes at the contact zone between NK cells and K562 cells. Together, our data indicate

227 that CD38 plays a crucial role in the establishment of the immune synapse and in NK cell cytotoxic function  
228 towards cancer cells.

## 229 **Discussion**

230 During pregnancy, the maternal immune system is engaged in a fine balance: tolerance is required to  
231 preserve the fetus while defenses must be maintained to protect mother and baby from microbial challenges.  
232 NK cells play a critical role in this balance as their job is to patrol the body for ‘altered self’(27). NK cell  
233 activity had been thought to be suppressed during pregnancy to protect the fetus (28), yet recent studies  
234 have suggested a more nuanced view. NK cells from pregnant women display diminished responses to  
235 stimulation with cytokines and phorbol-myristate acetate and ionomycin (12, 15, 16), yet NK cell responses  
236 to influenza-infected cells are enhanced (12). Here we profiled NK cells from pregnant and non-pregnant  
237 women to better understand how NK cell phenotype and function are altered during pregnancy. We  
238 discovered that pregnancy is characterized by increased expression of the multi-faceted surface protein  
239 CD38 on NK cells. CD38 is expressed on a large proportion of NK cells even in non-pregnant individuals  
240 and is significantly increased in cell surface density during pregnancy. CD38<sup>+</sup> NK cells display a mature  
241 phenotype and kill both infected and tumor cells more effectively than CD38<sup>-</sup> NK cells. The basis of this  
242 enhanced responsiveness is the ability of CD38 to promote immune synapse formation between NK cells  
243 and infected and tumor cells. These observations not only demonstrate a new role for CD38 in promoting  
244 NK cell functional responses through immune synapse formation, but also provide a mechanistic  
245 understanding of why NK cells display enhanced responses to influenza virus during pregnancy.

246

247 Pregnant women are significantly more likely to suffer adverse consequences from influenza infection than  
248 are the general population. During the 1918 influenza pandemic, the case fatality rate for influenza infection  
249 was estimated to be 27-75% among pregnant women but only 2-3% among the general population (29).  
250 Even with improved supportive care, the case-fatality rate among pregnant women was twice that of the  
251 general population during the 2009 pandemic (3). Thus, an understanding of the mechanisms driving this  
252 enhanced susceptibility to influenza infection during pregnancy represents an important challenge for the  
253 scientific community. During influenza virus infection, the recruitment of peripheral NK cells into the lungs

254 represents one of the first lines of defense following influenza infection (30). Though isolated NK cells  
255 stimulated with cytokines or chemicals have suppressed responses during pregnancy, our data here confirm  
256 earlier findings that NK cell responses to autologous influenza-infected cells are enhanced during pregnancy  
257 (12). This enhanced responsiveness could be deleterious to lung integrity and drive pathogenesis. Consistent  
258 with this idea, Kim and colleagues demonstrated that pregnant mice infected by influenza virus have an  
259 increased lung inflammation and damage compared to non-pregnant mice (31). Further, Littauer and  
260 colleagues suggested that innate immune responses play a role in the initiation of pregnancy complications  
261 such as pre-term birth and stillbirth following influenza virus infection (10). Finally, the idea that enhanced  
262 NK cell responses could be detrimental in pregnant women is consistent with observations that  
263 hyperinflammatory responses are a driving force behind severe influenza disease in humans (32-34). Thus,  
264 to better understand the potential contributions of NK cells to influenza pathogenesis during pregnancy, we  
265 sought to define exactly how pregnancy altered human NK cells.

266

267 We were surprised to discover that the most dramatic and consistent difference between NK cells of  
268 pregnant and non-pregnant women was an increase in CD38 expression during pregnancy. While CD38 is  
269 most commonly viewed as an activation marker on T cells, it is more highly expressed on NK cells and has  
270 several important functions. First, CD38 confers lymphocytes with the ability to adhere to endothelial cells  
271 through its binding to CD31, a necessary step in extravasation. CD38 also functions as an ectoenzyme,  
272 converting extracellular NAD<sup>+</sup> to cADPR through its cyclase activity or cADPR to Adenosyl-di-phosphate  
273 ribose through its hydrolase activity (35). These molecules in turn can diffuse into the cell and promote its  
274 activation by driving intracellular calcium increase, phosphorylation of signaling molecules, production of  
275 cytokines, and vesicular transport (35). The diverse roles and functions raised the question of whether  
276 increased CD38 expression during pregnancy is merely a marker of a more 'activated' state or whether it  
277 was playing a direct role in modulating NK cell function. Thus, we first explored whether CD38 expression  
278 marked a unique subset of NK cells. We found that expression of CD38 marks a population of NK cells

279 with a differential expression of KIRs, CD11b, CD57, perforin and CD94 compared to CD38<sup>-</sup> NK cells,  
280 indicating a higher degree of cell maturation (36). In particular, the high expression of one or several KIRs  
281 on CD38<sup>+</sup> NK cells is an essential feature characterizing NK cell maturation and terminal differentiation  
282 (37, 38). This suggests that CD38<sup>+</sup> NK cells are functionally competent, with high cytotoxic abilities, but  
283 also likely self-tolerant since they display at least one inhibitory receptor for Major Histocompatibility  
284 Complex. The high degree of co-expression between KIR and CD38 could reflect a need to assure tolerance  
285 towards fetal semi-allogenic antigens, while maintaining a high degree of cytotoxicity towards virus-  
286 infected and transformed cells, as demonstrated here.

287

288 Our demonstration here that CD38 contributes to the formation of immune synapse between NK cells and  
289 their targets represents a novel role for this molecule. While much is known about its enzymatic activities  
290 and adhesion functions through interaction with CD31, CD38 has not been extensively studied in terms of  
291 the biology of immune cells, especially cytotoxic ones. We show here that CD38-CD31 interactions are  
292 necessary to establish the NK immune synapse and for its cytotoxic activity against influenza-infected target  
293 cells. Importantly, this function for CD38 was not restricted to NK cells role in responding to influenza-  
294 infected cells, as we also show that blocking CD38 diminishes the ability to kill tumor targets. Thus, CD38  
295 has a previously unrecognized, but critical, role in facilitating cytolytic activity against both infected cells  
296 and tumor targets. Interestingly, blocking CD38 diminished both IFN- $\gamma$  production and cytolytic activity in  
297 response to influenza-infected cells, but diminished only cytolytic activity, and not IFN- $\gamma$  production, in  
298 response to K562 cells. This is likely due to a requirement for both cytokines (primarily type I interferons)  
299 and cellular contact to obtain maximal IFN- $\gamma$  production by NK cells (Kronstad et al., in revision and  
300 bioRxiv). While infected monocytes produce abundant IFN- $\alpha$ , K562 cells do not.

301

302 This study leaves open the question of the mechanism by which CD38 is increased during pregnancy. CD38  
303 protein expression increases with age (39). Our pregnant and non-pregnant women were well-matched for

304 age, so this cannot account for the differences between cohorts. CD38 gene and protein expression is  
305 regulated by transcription factors induced by diverse potential signals such as cytokines and hormones (40,  
306 41). Thus, the altered hormonal and inflammatory environments during pregnancy could contribute to  
307 enhanced CD38 expression. In particular, NK cells express the estrogen receptor beta (42). Estrogen binding  
308 to its receptor in peripheral NK cells could increase CD38 expression during pregnancy, especially during  
309 second and third trimester where a substantial increase in estrogen concentration in the blood is observed  
310 (43). While this has not been explored in humans or in pregnancy, CD38 protein expression on  
311 cardiomyocytes was increased following injection of systemic estrogen, but not progesterone, in a rat model  
312 (41).

313

314 Harnessing NK cell cytotoxic power has been of great interest within the scientific community within the  
315 last several years. Several studies suggest that CAR-modified NK cell immunotherapy may be as effective  
316 as CAR-T cells in recognizing and killing target cells after genetic modification (44, 45). Thus, the  
317 identification of a new role for CD38 in immune synapse formation has significant implications for these  
318 therapies. For immunotherapy approaches in which cytotoxic activity is desired, it will be important to  
319 assure that these cells express CD38. Further, it will be important to understand the factors that control  
320 CD38 expression *in vivo* to assure its retention on effector cells. For instance, we find that both IL-2 and  
321 IL-15, two important cytokines for NK cell homeostasis, promote increased CD38 expression *in vitro* (data  
322 not shown). It is equally important that we assess the role of CD38 on CD8<sup>+</sup> cytotoxic T cells. Finally, our  
323 data raise interesting implications for the CD38-targeting agents that are currently in clinical use, primarily  
324 for multiple myeloma and chronic lymphocytic leukemia (46, 47). Clinical treatment with daratumumab, a  
325 specific human CD38 binding antibody, improves patient outcomes (46), but also may lead to NK cell  
326 fratricide as most NK cells express CD38 (48, 49). It is currently unclear how daratumumab affects CD38-  
327 mediated immune synapse formation, and how this influences NK cell killing. This will be an important  
328 area of future investigation.

329

330

331 There are several limitations of our study, including the fact that our mass cytometry panels differed  
332 between the two cohorts and remain limited to ~40 markers. Thus, we may have excluded other molecules  
333 involved in NK cell immune responses during pregnancy, including critical NK cell surface molecules such  
334 as DNAM-1, TIGIT and Siglec-7. We also did not follow-up on other differences that were seen in only  
335 one cohort. Further, here we studied peripheral blood NK cells and were not able to sample lung resident  
336 NK cells or uterine NK cells. Finally, we had limited data reflecting the prior history of the infected and  
337 control women in terms of their prior vaccination status, prior influenza infection status, cigarette and drug  
338 use, and others. We cannot exclude that unmeasured factors could influence the quality of the NK cell  
339 response to influenza.

340

341 Here, our goal was to better understand NK cell biology and activity in the context of pregnancy and  
342 influenza virus infection. Our work reveals that CD38 expression is increased on NK cells during  
343 pregnancy, and that CD38 marks a mature NK cell subset. Further, we demonstrate a novel role for CD38  
344 in the enhancement of NK cell responses through its role in immune synapse formation. This new pathway  
345 controlling NK cell function could be used as a target in future therapeutics to modulate NK cell killing  
346 activity.

347



## 348 **Materials and Methods**

### 349 *Study design*

350 The goal of this study was to determine changes in the phenotype and function of NK cells during  
351 pregnancy. Two cohorts of pregnant women enrolled during their second and third trimester and control  
352 non-pregnant women were recruited in separate years. In cohort 1, twenty-one healthy pregnant women  
353 were recruited between October 2013 and March 2014 from the Obstetrics Clinic at Lucile Packard  
354 Children's Hospital at Stanford University. Twenty-one non-pregnant (control) women were recruited at  
355 Stanford's Clinical and Translational Research Unit (NCT number: NCT03020537, NCT03022422 and  
356 NCT02141581). In cohort 2, thirty-two non-pregnant (control) women were recruited at Stanford's Clinical  
357 and Translational Research Unit (NCT numbers: NCT01827462 and NCT03022422) and twenty-one  
358 healthy pregnant women were recruited between October 2012 and March 2013 from the Obstetrics Clinic  
359 at Lucile Packard Children's Hospital at Stanford University. No difference in terms of age has been  
360 observed in both cohort between control and pregnant women (*t test*:  $p=0.1967$  for cohort 1; *t test*:  $p=0.1697$   
361 for cohort 2). Venous blood was collected from all participants at baseline; pregnant women also provided  
362 a sample at six weeks postpartum. Participant criteria are listed in Supplemental Table S1 and S2. Exclusion  
363 criteria for all participants included concomitant illnesses, immunosuppressive medications, or receipt of  
364 blood products within the previous year. Pregnant women were also excluded for known fetal abnormalities  
365 and morbid obesity (pre-pregnancy body mass index  $> 40$ ). This study was performed in accordance with  
366 the Declaration of Helsinki and approved by the Stanford University Institutional Review Board; written  
367 informed consent was obtained from all participants.

368 In addition, blood from healthy donors at the Stanford blood bank center was obtained to perform several  
369 functional assays in the study.

370

### 371 *PBMC Isolation and cryopreservation*

372 PBMCs from healthy donors and from individuals belonging to cohort 1 and 2 were isolated from whole  
373 blood by Ficoll-Paque (GE Healthcare) and cryopreserved in 90% fetal bovine serum (Thermo  
374 Scientific)/10% dimethyl sulfoxide (Sigma-Aldrich).

375

376

### 377 *PBMC Staining and CyTOF Acquisition*

378 Cryopreserved PBMCs from non-pregnant and pregnant women in cohort 1 and 2 were thawed and cells  
379 were transferred to 96-well deep-well plates (Sigma), resuspended in 25  $\mu$ M cisplatin (Enzo Life Sciences)  
380 for 1 min and quenched with 100% serum. Cells were stained for 30 min on ice, fixed (BD FACS Lyse),  
381 permeabilized (BD FACS Perm II), and stained with intracellular antibodies for 45 min on ice. Staining  
382 panels are described in Tables S3 and S4. All antibodies were conjugated using MaxPar X8 labeling kits  
383 (DVS Sciences). Cells were suspended overnight in iridium interchelator (DVS Sciences) in 2%  
384 paraformaldehyde in phosphate-buffered saline (PBS) and washed 1 $\times$  in PBS and 2 $\times$  in H<sub>2</sub>O immediately  
385 before acquisition on a CyTOF-1 (Fluidigm).

386

### 387 *Preprocessing of Mass Cytometry Data*

388 Prior to analysis, we transform protein counts using the inverse hyperbolic sine function. This  
389 transformation assumes a two-component model for the measurement error (50, 51): small counts are less  
390 noisy than large counts. This model can be justified due to CyTOF2's dual count scale (CyTOF2 Mass  
391 Cytometer User Manual): less abundant proteins can be measured more precisely than high abundant  
392 proteins due to pulse overlap in the detector.

### 393 *Generalized Linear Mixed Model*

394 The response  $y_i$  specifies the experimental group for the  $i^{\text{th}}$  cell, e.g. encoding whether the cell  $i$  was  
395 stimulated ( $y_i = 0$ ) or unstimulated ( $y_i = 1$ ), and the explanatory variables are inverse hyperbolic sine

396 transformed protein counts  $\mathbf{x}_i$ . Each vector  $\mathbf{x}_i$  is of length  $p$  equal to the number of measured proteins. Each  
397 experiment will produce  $n$  pairs of  $(y_1, \mathbf{x}_1), \dots, (y_n, \mathbf{x}_n)$  coming from different donors. Our statistical model  
398 is

$$399 \quad y_i \sim \text{Bernoulli}(\pi_i)$$

$$400 \quad \log\left(\frac{\pi_i}{1 - \pi_i}\right) = \beta_{\text{donor}[i],0} + \sum_{j=1}^p \beta_{\text{donor}[i],j} x_{i,j} = \boldsymbol{\beta}_{\text{donor}[i]}^T \mathbf{x}_i$$

$$401 \quad \boldsymbol{\beta}_{\text{donor}[i]} \sim \text{Normal}(\boldsymbol{\theta}, \boldsymbol{\Sigma}).$$

402

403 In our notation for regression coefficients  $\beta_{\text{donor}[i],j}$ , the first subscript  $\text{donor}[i]$  maps the  $i^{\text{th}}$  cell to its donor,  
404 and the second subscript indexes the  $j^{\text{th}}$  protein marker. We assume that the donor specific coefficients are  
405 distributed according to a multivariate normal distribution. This model is often called a Generalized Linear  
406 Mixed Model (GLMM). Using the GLMM terminology, the unknown parameters that we need to estimate  
407 are the fixed effects  $\boldsymbol{\theta}$ , the random effects  $\boldsymbol{\beta}_{\text{donor}[i]}$ , and the covariance matrix  $\boldsymbol{\Sigma}$  of the random effect.  
408 GLMMs can account for donor specific heterogeneity by separating donor specific variation from overall  
409 variation. As it is common in single cell datasets, we observe 10,000 to 100,000 cells per donor and measure  
410 30 to 40 proteins. To handle such large amounts of data, we use the R package *mbest* that implements a fast  
411 moment-based estimation to fit GLMM models (52). One key assumption in GLMMs is the modeling of  
412 random effects by a multivariate normal distribution.

413

#### 414 *Generalized Linear Model with Bootstrap Resampling*

415 Our GLMM approach can be directly applied to paired experiments. In immunology, we often have a paired  
416 experimental design when comparing stimulated with unstimulated cells taken from the same blood sample.  
417 We also have paired samples, if we compare the functional response of different cell types within the sample  
418 blood sample. In contrast, in our pregnancy study, we have blood samples from pregnant and not pregnant  
419 donors. Furthermore, we do not have any additional covariates that we could use to match samples. In such

420 cases, the GLMM approach might provide conservative results, therefore, we propose to use a  
421 nonparametric bootstrap resampling (53) approach using standard Generalized Linear Models (GLMs) (54),

422

423 
$$y_i \sim \text{Bernoulli}(\pi_i)$$

424 
$$\log\left(\frac{\pi_i}{1 - \pi_i}\right) = \beta_0 + \sum_{j=1}^p \beta_j x_{i,j} = \boldsymbol{\beta}^T \mathbf{x}_i.$$

425

426 In this approach, we handle the donor heterogeneity without explicitly defining a parametric mixed effects  
427 distribution. One bootstrap draw is taken by sampling donors with replacement. For each bootstrap sample,  
428 we fit a GLM using the base R implementation. We repeat this procedure  $B$  times resulting in  $B$  coefficient  
429 vectors  $\boldsymbol{\beta}_1^*, \dots, \boldsymbol{\beta}_B^*$ . We can then compute component-wise quantiles of these vectors to obtain confidence  
430 intervals.

431

432 *R Package: CytoGLMM*

433

434 All previously mentioned regression methods and additional exploratory data analysis tools are available in  
435 our new R package *CytoGLMM*.

436 The package can be installed from GitHub (<https://github.com/ChristofSeiler/CytoGLMM>).

437

438 *Virus Preparation*

439 A/California/7/2009 influenza (pH1N1) wild-type influenza A viruses obtained from Kanta Subbarao at the  
440 National Institutes of Health were propagated in embryonated chicken eggs.

441

442 *Cell purification for functional assays*

443 Cryopreserved PBMCs from healthy donors, or non-pregnant and pregnant women from cohort 1, were  
444 thawed and washed with complete RP10 media (RPMI 1640 (Invitrogen) supplemented with 10% fetal  
445 bovine serum (FBS), 2 mM L-glutamine, 100 U/ml penicillin, 100 mg/ml streptomycin (Life  
446 Technologies)) and 50 U/mL benzonase (EMD Millipore).

447 Cell isolation. Autologous NK cells and/or monocytes were purified by magnetic-activated cell sorting via  
448 negative selection (Miltenyi). In several experiments, CD38<sup>-</sup> NK cells were further isolated from total NK  
449 cells by magnetic-activated cell sorting via negative selection (Miltenyi).

450 Cell sorting. Autologous NK cells and/or monocytes were sorted using Sony sorter SH800 (Sony). The  
451 following antibodies were used to perform NK cell and monocyte sorting: CD3-Allophycocyanine (clone  
452 OKT3; BioLegend), CD14-Brilliant Violet 421 (clone HCD14; BioLegend), CD19-Alexa Fluor 488 (clone  
453 HIB19; Biolegend) and CD56-Phycoerythrin Cyanine 7 (clone NCAM; BioLegend).

454

#### 455 *Monocyte infection by influenza virus*

456 Following isolation or purification, monocytes were washed and re-suspended in serum-free RPMI media  
457 at  $1 \times 10^5$  per 100  $\mu$ L and infected at a multiplicity of infection (MOI) of 3 for 1 h at 37°C with 5% carbon  
458 dioxide. One-hour post-infection, viral inoculum was removed and cells were re-suspended in 100  $\mu$ L of  
459 complete RP10. Autologous NK cells were incubated separately for 5 min in Fc Block, washed, and  
460 incubated for 15 min with CD38 (clone AT1/3, Bio-Rad), CD31 (clone WM59, Biolegend) or LFA-1 (clone  
461 TS1/22, Invitrogen) blocking antibodies or isotype control antibodies. NK cells were then exposed to  
462 pH1N1-infected monocytes at a effector:target (E:T) ratio 1:1. After a further 2-hour incubation, 2  $\mu$ M  
463 monensin, 3  $\mu$ g/mL brefeldin A (eBiosciences), and anti-CD107a-allophycocyanin-H7 (BD Pharmingen)  
464 were added to the co-culture for 4 hours, followed by cell staining for flow cytometry analysis.

465

466 *NK cell exposure to autologous K562 tumor cell line.*

467 Following isolation or purification, NK cells were incubated for 5 min in Fc Block, washed, and incubated  
468 for 15 min with CD38, CD31 or LFA-1 blocking antibodies or isotype control antibodies. NK cells were  
469 then exposed to pH1N1-infected monocytes at a Effector:Target (E:T) ratio 1:1. Immediately following co-  
470 incubation, 2  $\mu$ M monensin, 3  $\mu$ g/mL brefeldin A, and anti-CD107a-allophycocyanin-H7 were added to the  
471 co-culture for 4 hours, followed by cell staining for flow cytometry analysis.

472

#### 473 *Cell staining and Flow-Cytometry Analysis*

474 Cells were stained with LIVE/DEAD fixable Aqua Stain (Life Technologies), followed by surface staining  
475 and then fixed and permeabilized with FACS Lyse and FACS Perm II (BD Pharmingen) according to the  
476 manufacturer's instructions. Cells were stained with anti-CD3-PE or -APC, anti-CD16-PerCPCy5.5 (clone  
477 3G8; BioLegend), anti-CD38-PE or FITC (clone HIT2 Biolegend), anti-IFN $\gamma$ -FITC or V450 (clone B27;  
478 BD Biosciences), anti-CD56-PEcy7, or anti-CD14-APC or -APC-H7 and fixed using 1%  
479 paraformaldehyde. Uncompensated data were collected using a three-laser MACSQuant<sup>®</sup> Analyser  
480 (Miltenyi). Analysis and compensation were performed using FlowJo flow-cytometric analysis software,  
481 version 9.9.4 (Tree Star).

482

#### 483 *Confocal microscopy*

484 Isolated NK cells were stained using CellTrace Violet dye (Thermofischer) for 20 min at RT then washed  
485 twice in PBS. Isolated NK and mock- or pH1N1-infected monocytes were incubated on a Poly-L-Lysine  
486 pre-coated 8 well  $\mu$ -slide (Ibidi) for 2 hours (enough time to let the cells settle down). Cells were then  
487 washed in PBS-FBS 2%, fixed in PFA 4% for 15 min and washed twice in PBS-FBS 2%. Cells were then  
488 stained with mouse anti-CD38 and/or rabbit anti-LFA-1 antibody for 30 min at RT, then washed twice in  
489 PBS-FBS 2%. Secondary staining was performed using a goat anti-mouse AlexaFluor594 or a goat anti-  
490 rabbit AlexaFuor488 antibody for 30 min at RT. After washing the cells twice in PBS-FBS 2%, cell mount

491 media (Ibidi) was added on cells for microscopy. Images were acquired using LSM880 Meta (Zeiss) laser  
492 scanning confocal microscope equipped with a 63× (NA 1.4) DIC oil objective.

493

#### 494 *Flow cytometry-based conjugation assay*

495 Isolated NK cells were labeled with CellTrace CFSE for 20 min at 37°C, washed and incubated with Fc  
496 Block for 5 min. NK cells were then incubated with no antibody, an isotype control or CD38 blocking  
497 antibody for 15 min at 37°C. pH1N1-infected monocytes or K562 cells were labelled with CellTrace violet  
498 for 20 min at RT. 10<sup>5</sup> NK cells and 2 × 10<sup>5</sup> target cells (E:T ratio 1:2) were mixed in 200 μl complete RP10,  
499 incubated for the indicated times (0, 20 or 40 min) at 37°C, vortexed, and fixed with 1% PFA in PBS. Cell  
500 mixtures were run on a three-laser MACSQuant® Analyser (Miltenyi). Analysis and compensation were  
501 performed using FlowJo flow-cytometric analysis software, version 9.9.4 (Tree Star).

502

#### 503 *Statistical Analysis*

504 Modeling was discussed above. Other statistical analyses were performed using GraphPad Prism, version  
505 6.0d (GraphPad Software). Pregnant and control participant characteristics were compared using Mann–  
506 Whitney *U* Tests for continuous variables and Fisher’s exact test for discrete variables. Pregnant and  
507 postpartum samples were compared using Wilcoxon match-paired test. Functional results were compared  
508 between groups using Mann–Whitney *U* tests.

509

## 510 **Supplementary Materials**

511 Fig. S1 Figure S1. NK cell gating strategy.

512 Fig S2. CD38 expression in control, pregnant and postpartum women from cohort 1 and 2.

513 Fig S3. Gating strategy for each marker on NK cells from cohort 1.

514 Fig S4. Gating strategy for each marker on NK cells from cohort 2.

515 Fig S5. Percentage of expression for each marker on NK cells from cohort 1 and 2 using conventional  
516 gating.

517 Fig S6. Mean Signal intensity of NK cell marker in control, pregnant and postpartum from cohort 1 using  
518 conventional gating.

519 Fig S7. Mean Signal intensity of NK cell marker in control, pregnant and postpartum from cohort 2 using  
520 conventional gating.

521 Fig S8. Comparison of CD38<sup>-</sup> and CD38<sup>+</sup> NK cell expression of each marker in control and pregnant women  
522 from cohort 1 using logistic regression model and conventional gating.

523 Fig S9. Comparison of activating and inhibitory receptor expression on CD38<sup>-</sup> and CD38<sup>+</sup> NK cells from  
524 cohort 2 in control or pregnant women by conventional gating.

525 Fig S10. Effect of the CD38 enzyme inhibitor, kuromanin, on the NK cell response to H1N1-infected  
526 monocytes.

527 Fig S11. CD38 contributes to NK cell - influenza-infected monocytes conjugation.

528 Table S1. Demographics for cohort 1.

529 Table S2. Demographics for cohort 2.

530 Table S3. Antibody panel for mass cytometry in cohort 1.

531 Table S4. Antibody panel for mass cytometry in cohort 2.

532



533 **Acknowledgements:** We thank our study volunteers for their participation in these studies, Sally Mackey  
534 for regulatory and data management, Sue Swope for consenting and conducting study visits and the staff of  
535 the Stanford Vaccine Program for overall study coordination.

536

537 **Funding:** This was supported by an Elizabeth and Russell Siegelman Fellowship in Infectious Diseases  
538 from the Stanford Child Health Research Institute (CHRI) to A.W.K., a Stanford CHRI postdoctoral  
539 fellowship to M.L.G., the CHRI – Stanford Clinical and Translational Science Award grant number UL1  
540 TR000093 (A.W.K.), a National Institutes of Health (NIH) Training Grant: Viral Infections in Children  
541 T32 AI78896-05 (A.W.K.), a Smith Family Stanford Graduate Fellowship (N.L.B.), Ruth L. Kirschstein  
542 NRSA 1F31HD089675 (N.L.B.), a Clinical Scientist Development Award #2013099 from the Doris Duke  
543 Charitable Foundation (C.A.B.), the McCormick Faculty Award (C.A.B.), Tasha and John Morgridge  
544 Endowed Faculty Scholar in Pediatric Translational Medicine from Stanford CHRI and Stanford University  
545 School of Medicine (C.A.B.), an NIH Director’s New Innovator Award DP2AI112193 (C.A.B.), an  
546 Infrastructure and Opportunity Fund (C.A.B.) as part of the Stanford Human Immunology Project  
547 Consortium (HIPC) Grant U19AI090019 (M.M.D.), and an investigator award from the Chan Zuckerberg  
548 Biohub (C.A.B.). Clinical cohorts were supported by NIH U19AI057229 (M.M.D.) and an NIH/NCRR  
549 CTSA award UL1 RR025744 (H. Greenberg).

550

551 **Author contributions:** M.L.G., A.W.K., N.L.B. and C.A.B. designed experiments. M.L.G., A.W.K. and  
552 N.L.B. conducted experiments. M.L.G. and C.S. analyzed the data. E.L., L.M., S.S.S.O., P.K., collaborated  
553 and provided advice in the analysis of the data. M.L.G and C.A.B. wrote the manuscript. M.M.D., C.L.D.,  
554 G.E.S. and N.A. coordinated and provided human samples. M.M.D., C.S., and S.H. revised the manuscript.

555

556 **Competing interests:** All authors have no competing interests to declare.

557

558 **Data and materials availability:** Materials are available from the corresponding authors upon request.

559 All .FCS files will be uploaded to Immport upon publication.

560

561

562 **References and Notes:**

- 563 1. S. B. Omer, R. Bednarczyk, S. A. Madhi, K. P. Klugman, Benefits to mother and child of influenza  
564 vaccination during pregnancy. *Human Vaccines & Immunotherapeutics*. **8**, 130–137 (2012).
- 565 2. R. S. Raj, E. A. Bonney, M. Phillippe, Influenza, immune system, and pregnancy. *Reprod Sci*. **21**, 1434–  
566 1451 (2014).
- 567 3. Centers for Disease Control and Prevention (CDC), Estimates of deaths associated with seasonal  
568 influenza --- United States, 1976–2007. *MMWR Morb. Mortal. Wkly. Rep*. **59**, 1057–1062 (2010).
- 569 4. A. M. Siston *et al.*, Pandemic 2009 influenza A(H1N1) virus illness among pregnant women in the  
570 United States. *JAMA*. **303**, 1517–1525 (2010).
- 571 5. C. Härtel *et al.*, Preterm Birth during Influenza Season Is Associated with Adverse Outcome in Very  
572 Low Birth Weight Infants. *Frontiers in Pediatrics*. **4**, 797 (2016).
- 573 6. A. Erlebacher, Immunology of the maternal-fetal interface. *Annual Review of Immunology*. **31**, 387–  
574 411 (2013).
- 575 7. M. PrabhuDas *et al.*, (Nature Publishing Group, 2015), vol. 16, pp. 328–334.
- 576 8. A. P. Kourtis, J. S. Read, D. J. Jamieson, Pregnancy and infection. *N. Engl. J. Med*. **371**, 1077–1077  
577 (2014).
- 578 9. N. Periolo *et al.*, Pregnant women infected with pandemic influenza A(H1N1)pdm09 virus showed  
579 differential immune response correlated with disease severity. *J. Clin. Virol*. **64**, 52–58 (2015).
- 580 10. E. Q. Littauer *et al.*, H1N1 influenza virus infection results in adverse pregnancy outcomes by disrupting  
581 tissue-specific hormonal regulation. *PLoS Pathog*. **13**, e1006757 (2017).
- 582 11. M. Pazos, R. S. Sperling, T. M. Moran, T. A. Kraus, The influence of pregnancy on systemic immunity.  
583 *Immunol. Res*. **54**, 254–261 (2012).
- 584 12. A. W. Kay *et al.*, Enhanced natural killer-cell and T-cell responses to influenza A virus during  
585 pregnancy. *Proc. Natl. Acad. Sci. U.S.A*. **111**, 14506–14511 (2014).
- 586 13. M. Le Gars *et al.*, Increased Pro-Inflammatory Responses of Monocytes and Plasmacytoid Dendritic  
587 Cells to Influenza A Virus Infection During Pregnancy. *J. Infect. Dis*. **214**, jiw448–1671 (2016).
- 588 14. N. Aghaeepour *et al.*, An immune clock of human pregnancy. *Sci Immunol*. **2**, eaan2946 (2017).
- 589 15. T. A. Kraus *et al.*, Characterizing the pregnancy immune phenotype: results of the viral immunity and  
590 pregnancy (VIP) study. *J. Clin. Immunol*. **32**, 300–311 (2012).
- 591 16. T. A. Kraus *et al.*, Peripheral blood cytokine profiling during pregnancy and post-partum periods. *Am*.  
592 *J. Reprod. Immunol*. **64**, 411–426 (2010).
- 593 17. S. Stegemann-Koniszewski *et al.*, Respiratory Influenza A Virus Infection Triggers Local and Systemic  
594 Natural Killer Cell Activation via Toll-Like Receptor 7. *Front Immunol*. **9**, e46581 (2018).
- 595 18. S.-H. Lee, T. Miyagi, C. A. Biron, Keeping NK cells in highly regulated antiviral warfare. *Trends*  
596 *Immunol*. **28**, 252–259 (2007).

- 597 19. E. Vivier, E. Tomasello, M. Baratin, T. Walzer, S. Ugolini, Functions of natural killer cells. *Nat.*  
598 *Immunol.* **9**, 503–510 (2008).
- 599 20. D. M. Strauss-Albee, A. Horowitz, P. Parham, C. A. Blish, Coordinated regulation of natural killer  
600 receptor expression in the maturing human immune system.  
601 *J. Immunol.* (2014).
- 602 21. E. Vendrame, J. Fukuyama, D. M. Strauss-Albee, S. Holmes, C. A. Blish, Mass Cytometry Analytical  
603 Approaches Reveal Cytokine-Induced Changes in Natural Killer Cells. *Cytometry Part B: Clinical*  
604 *Cytometry.* **92**, 57–67 (2017).
- 605 22. M. Howard *et al.*, Formation and hydrolysis of cyclic ADP-ribose catalyzed by lymphocyte antigen  
606 CD38. *Science.* **262**, 1056–1059 (1993).
- 607 23. S. Takasawa *et al.*, Synthesis and hydrolysis of cyclic ADP-ribose by human leukocyte antigen CD38  
608 and inhibition of the hydrolysis by ATP. *J. Biol. Chem.* **268**, 26052–26054 (1993).
- 609 24. A. L. Horenstein, H. Stockinger, B. A. Imhof, F. Malavasi, CD38 binding to human myeloid cells is  
610 mediated by mouse and human CD31. *Biochem. J.* **330 ( Pt 3)**, 1129–1135 (1998).
- 611 25. S. Deaglio *et al.*, CD38/CD31, a receptor/ligand system ruling adhesion and signaling in human  
612 leukocytes. *Chem. Immunol.* **75**, 99–120 (2000).
- 613 26. F. Morandi *et al.*, A non-canonical adenosinergic pathway led by CD38 in human melanoma cells  
614 induces suppression of T cell proliferation. *Oncotarget.* **6**, 25602–25618 (2015).
- 615 27. H. G. Hilton, P. Parham, Missing or altered self: human NK cell receptors that recognize HLA-C.  
616 *Immunogenetics.* **69**, 567–579 (2017).
- 617 28. A. P. Kourtis, J. S. Read, D. J. Jamieson, Pregnancy and infection. *N. Engl. J. Med.* **370**, 2211–2218  
618 (2014).
- 619 29. S. A. Rasmussen, D. J. Jamieson, J. S. Bresee, Pandemic influenza and pregnant women. *Emerging*  
620 *Infect. Dis.* **14**, 95–100 (2008).
- 621 30. L. E. Carlin, E. A. Hemann, Z. R. Zacharias, J. W. Heusel, K. L. Legge, Natural Killer Cell Recruitment  
622 to the Lung During Influenza A Virus Infection Is Dependent on CXCR3, CCR5, and Virus Exposure Dose.  
623 *Front Immunol.* **9**, 781 (2018).
- 624 31. H. M. Kim, Y. M. Kang, B. M. Song, H. S. Kim, S. H. Seo, The 2009 pandemic H1N1 influenza virus  
625 is more pathogenic in pregnant mice than seasonal H1N1 influenza virus. *Viral Immunol.* **25**, 402–410  
626 (2012).
- 627 32. C. Y. Cheung *et al.*, Induction of proinflammatory cytokines in human macrophages by influenza A  
628 (H5N1) viruses: a mechanism for the unusual severity of human disease? *Lancet.* **360**, 1831–1837 (2002).
- 629 33. D. Kobasa *et al.*, Aberrant innate immune response in lethal infection of macaques with the 1918  
630 influenza virus. *Nature.* **445**, 319–323 (2007).
- 631 34. M. D. de Jong *et al.*, Fatal outcome of human influenza A (H5N1) is associated with high viral load and  
632 hypercytokinemia. *Nat. Med.* **12**, 1203–1207 (2006).

- 633 35. F. Malavasi *et al.*, Evolution and function of the ADP ribosyl cyclase/CD38 gene family in physiology  
634 and pathology. *Physiol. Rev.* **88**, 841–886 (2008).
- 635 36. M. Luetke-Eversloh, M. Killig, C. Romagnani, Signatures of human NK cell development and terminal  
636 differentiation. *Front Immunol.* **4**, 499 (2013).
- 637 37. N. Anfossi *et al.*, Human NK cell education by inhibitory receptors for MHC class I. *Immunity.* **25**,  
638 331–342 (2006).
- 639 38. J. M. Elliott, W. M. Yokoyama, Unifying concepts of MHC-dependent natural killer cell education.  
640 *Trends Immunol.* **32**, 364–372 (2011).
- 641 39. J. Camacho-Pereira *et al.*, CD38 Dictates Age-Related NAD Decline and Mitochondrial Dysfunction  
642 through an SIRT3-Dependent Mechanism. *Cell Metab.* **23**, 1127–1139 (2016).
- 643 40. S. Deaglio, T. Vaisitti, S. Aydin, E. Ferrero, F. Malavasi, In-tandem insight from basic science  
644 combined with clinical research: CD38 as both marker and key component of the pathogenetic network  
645 underlying chronic lymphocytic leukemia. *Blood.* **108**, 1135–1144 (2006).
- 646 41. S. Dogan *et al.*, Estrogen increases CD38 gene expression and leads to differential regulation of  
647 adenosine diphosphate (ADP)-ribosyl cyclase and cyclic ADP-ribose hydrolase activities in rat  
648 myometrium. *Biol. Reprod.* **66**, 596–602 (2002).
- 649 42. M. Pierdominici *et al.*, Estrogen receptor profiles in human peripheral blood lymphocytes. *Immunol.*  
650 *Lett.* **132**, 79–85 (2010).
- 651 43. B. Polese *et al.*, The Endocrine Milieu and CD4 T-Lymphocyte Polarization during Pregnancy. *Front*  
652 *Endocrinol (Lausanne).* **5**, 106 (2014).
- 653 44. D. Liu *et al.*, Chimeric antigen receptor (CAR)-modified natural killer cell-based immunotherapy and  
654 immunological synapse formation in cancer and HIV. *Protein Cell.* **8**, 861–877 (2017).
- 655 45. K. Rezvani, R. Rouse, E. Liu, E. Shpall, Engineering Natural Killer Cells for Cancer Immunotherapy.  
656 *Mol. Ther.* **25**, 1769–1781 (2017).
- 657 46. H. M. Lokhorst *et al.*, Targeting CD38 with Daratumumab Monotherapy in Multiple Myeloma. *N. Engl.*  
658 *J. Med.* **373**, 1207–1219 (2015).
- 659 47. R. N. Damle *et al.*, Ig V gene mutation status and CD38 expression as novel prognostic indicators in  
660 chronic lymphocytic leukemia. *Blood.* **94**, 1840–1847 (1999).
- 661 48. K. A. Frerichs *et al.*, CD38-targeting antibodies in multiple myeloma: mechanisms of action and clinical  
662 experience. *Expert Rev Clin Immunol.* **14**, 197–206 (2018).
- 663 49. Y. Wang *et al.*, Fratricide of NK Cells in Daratumumab Therapy for Multiple Myeloma Overcome by  
664 Ex Vivo Expanded Autologous NK Cells. *Clin. Cancer Res.*, clincanres.3117.2017 (2018).
- 665 50. D. M. Rocke, S. Lorenzato, A Two-Component Model for Measurement Error in Analytical Chemistry.  
666 *Technometrics.* **37**, 176–184 (1995).
- 667 51. W. Huber, A. von Heydebreck, H. Sueltmann, A. Poustka, M. Vingron, Parameter estimation for the  
668 calibration and variance stabilization of microarray data. *Stat Appl Genet Mol Biol.* **2**, Article3 (2003).

- 669 52. P. O. Perry, Fast moment-based estimation for hierarchical models. *Journal of the Royal Statistical*  
670 *Society: Series B (Statistical Methodology)*. **79**, 267–291 (2016).
- 671 53. B. Efron, R. J. Tibshirani, in *An Introduction to the Bootstrap* (Springer US, Boston, MA, 1993), pp. 1–  
672 9.
- 673 54. P. McCullagh, J. A. Nelder, *Generalized Linear Models* (Springer US, Boston, MA, 1989).
- 674

675 **Figures**

676 **Figure 1. NK cell immune response to influenza infected and tumor cells during pregnancy.**

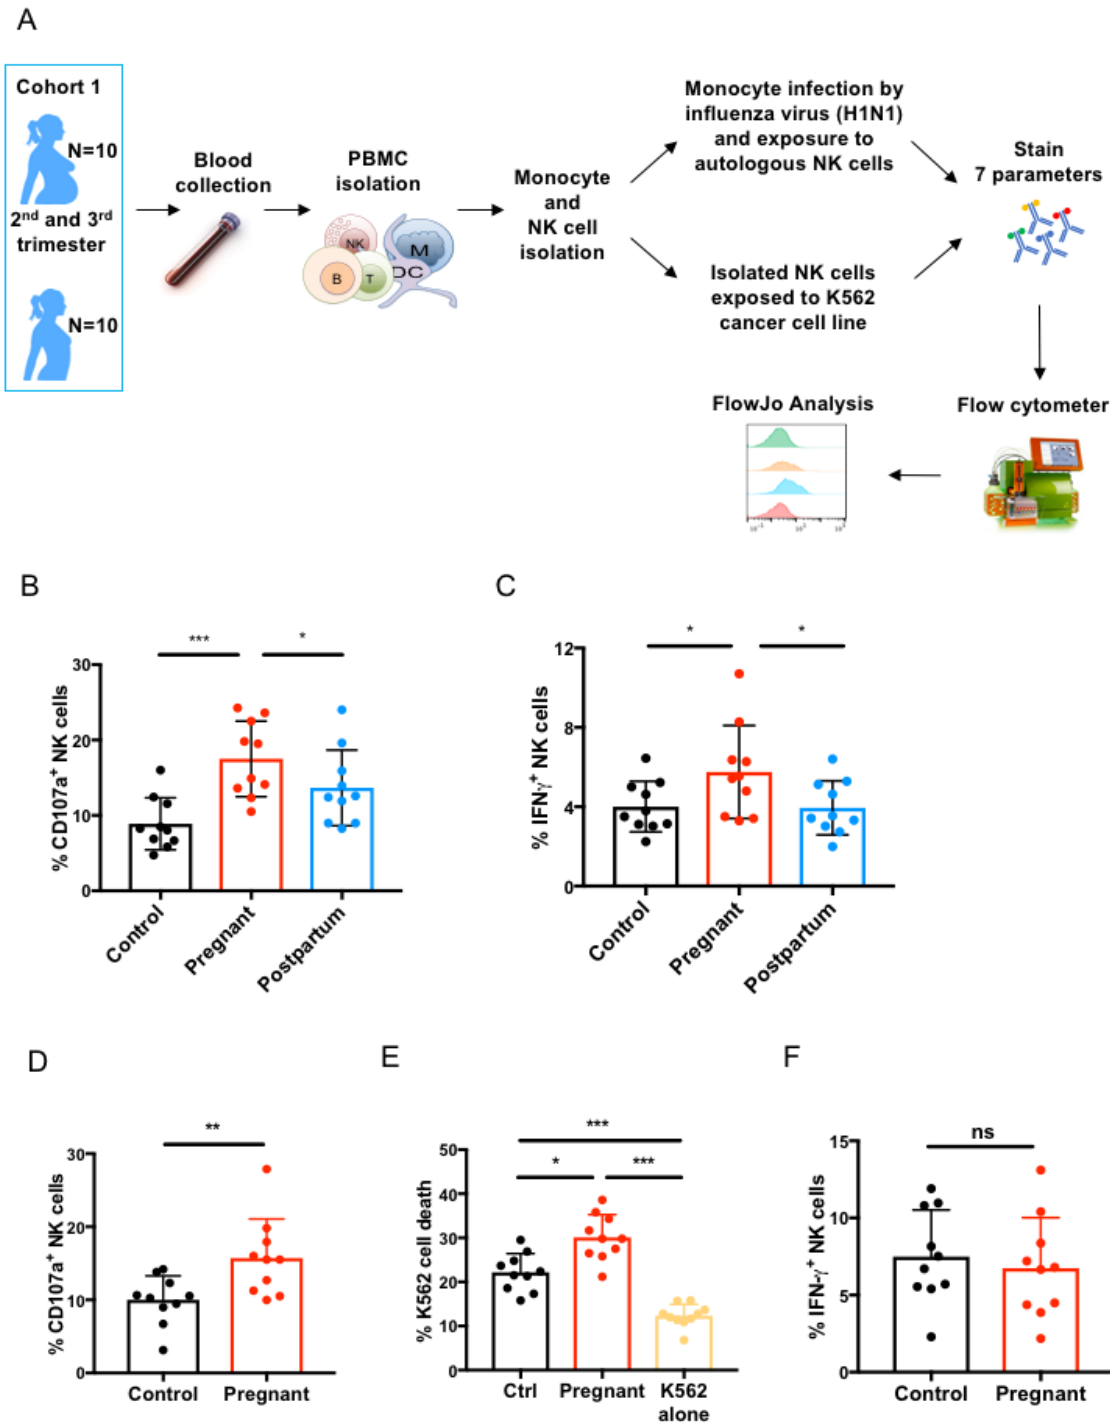

677

678 (A) Experimental workflow: PBMCs from controls (N=10), pregnant women (N=10) and postpartum  
679 women (N=10) in cohort 1 were isolated from blood samples. Monocytes and NK cells were sorted and  
680 monocytes were infected with the H1N1 influenza virus strain. NK cells were either exposed to H1N1-  
681 infected monocytes or to K562 tumor cells for 7h or 4h, respectively. The NK cell immune response was

682 then determined by flow cytometry. **(B)** The frequency of **(B)** CD107a- and **(C)** IFN- $\gamma$ -expressing NK cells  
683 in response to influenza-infected monocytes. **(D)** The frequency of CD107a-expressing NK cells in  
684 response to K562 cells. **(E)** The frequency of dead K562 cells as assessed by viability stain following co-  
685 culture with NK cells. **(F)** The frequency of IFN- $\gamma$ -production NK cells in response to K562 cells. \* $P < 0.05$ ,  
686 \*\* $P < 0.01$  and \*\*\* $P < 0.001$  (Mann–Whitney *U* Tests to compare controls vs. pregnant and control vs.  
687 postpartum; Wilcoxon matched-paired test to compare pregnant vs. postpartum).

688



689 **Figure 2. Deep profiling NK cells in non-pregnant and pregnant women.**

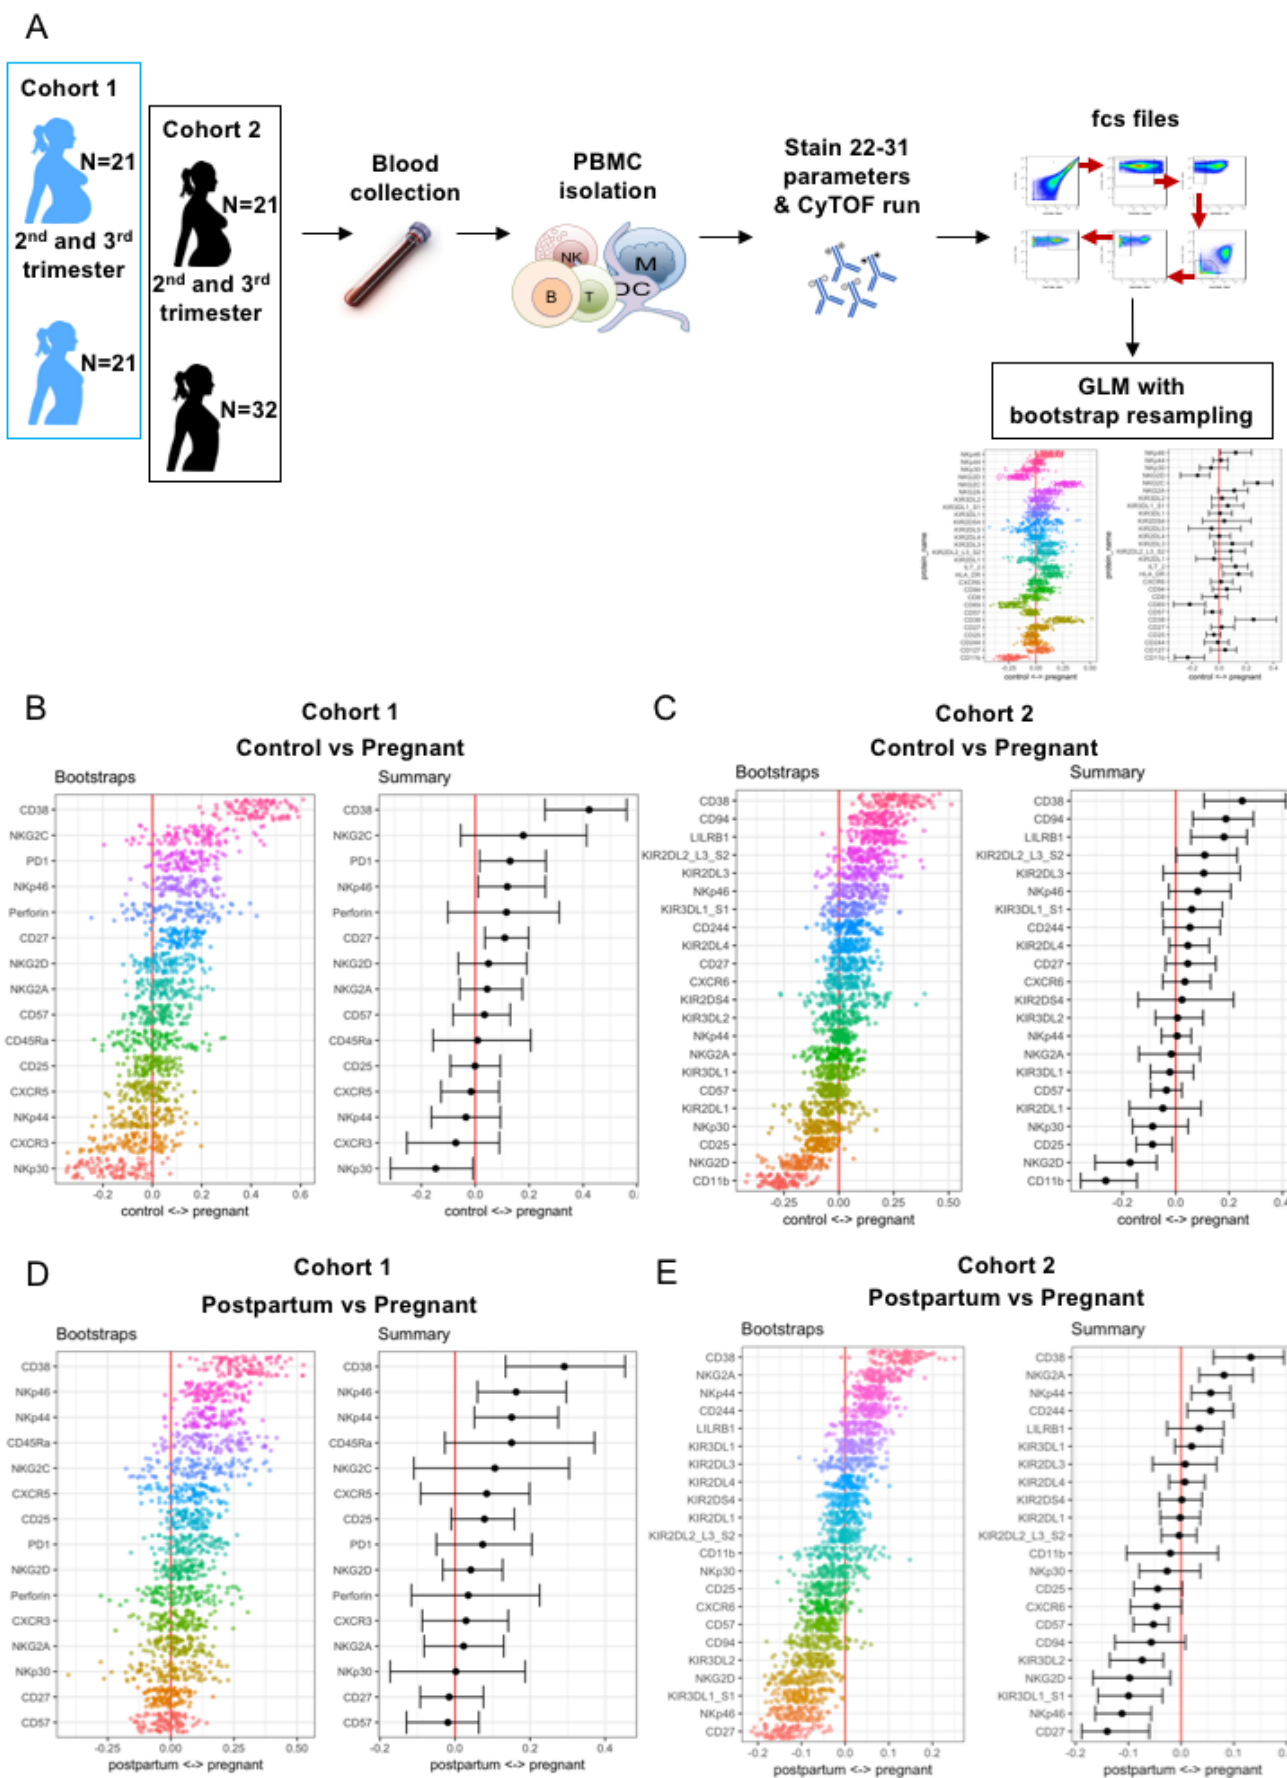

691 (A) Experimental workflow. PBMCs from controls, pregnant, and postpartum women were isolated and  
692 labeled using a 22- or 31-parameter antibody panel for cohort 1 and 2, respectively. (B) Markers predictive  
693 of control vs. pregnant women in Cohort 1 were assessed by GLM with bootstrap resampling. The markers  
694 are listed on the y-axis and the x-axis represents the log-odds that the marker expression levels predict the  
695 outcome (pregnancy on the left vs. control on the right). Dots in the left graph represent individual bootstrap  
696 samples, with summary data in the right panel showing the 95% confidence interval. Markers in which the  
697 bar does not cross zero are significantly predictive of one state vs. the other with a false discovery rate of  
698 5%. (C) Evaluation of markers predictive of pregnancy vs. postpartum in cohort 1. (D) Markers predictive  
699 of pregnancy vs. control and (E) pregnant vs. postpartum in cohort 2.

700

701

702 **Figure 3. NK cell immune response to influenza virus infection in non-pregnant, pregnant women**  
703 **and postpartum.**

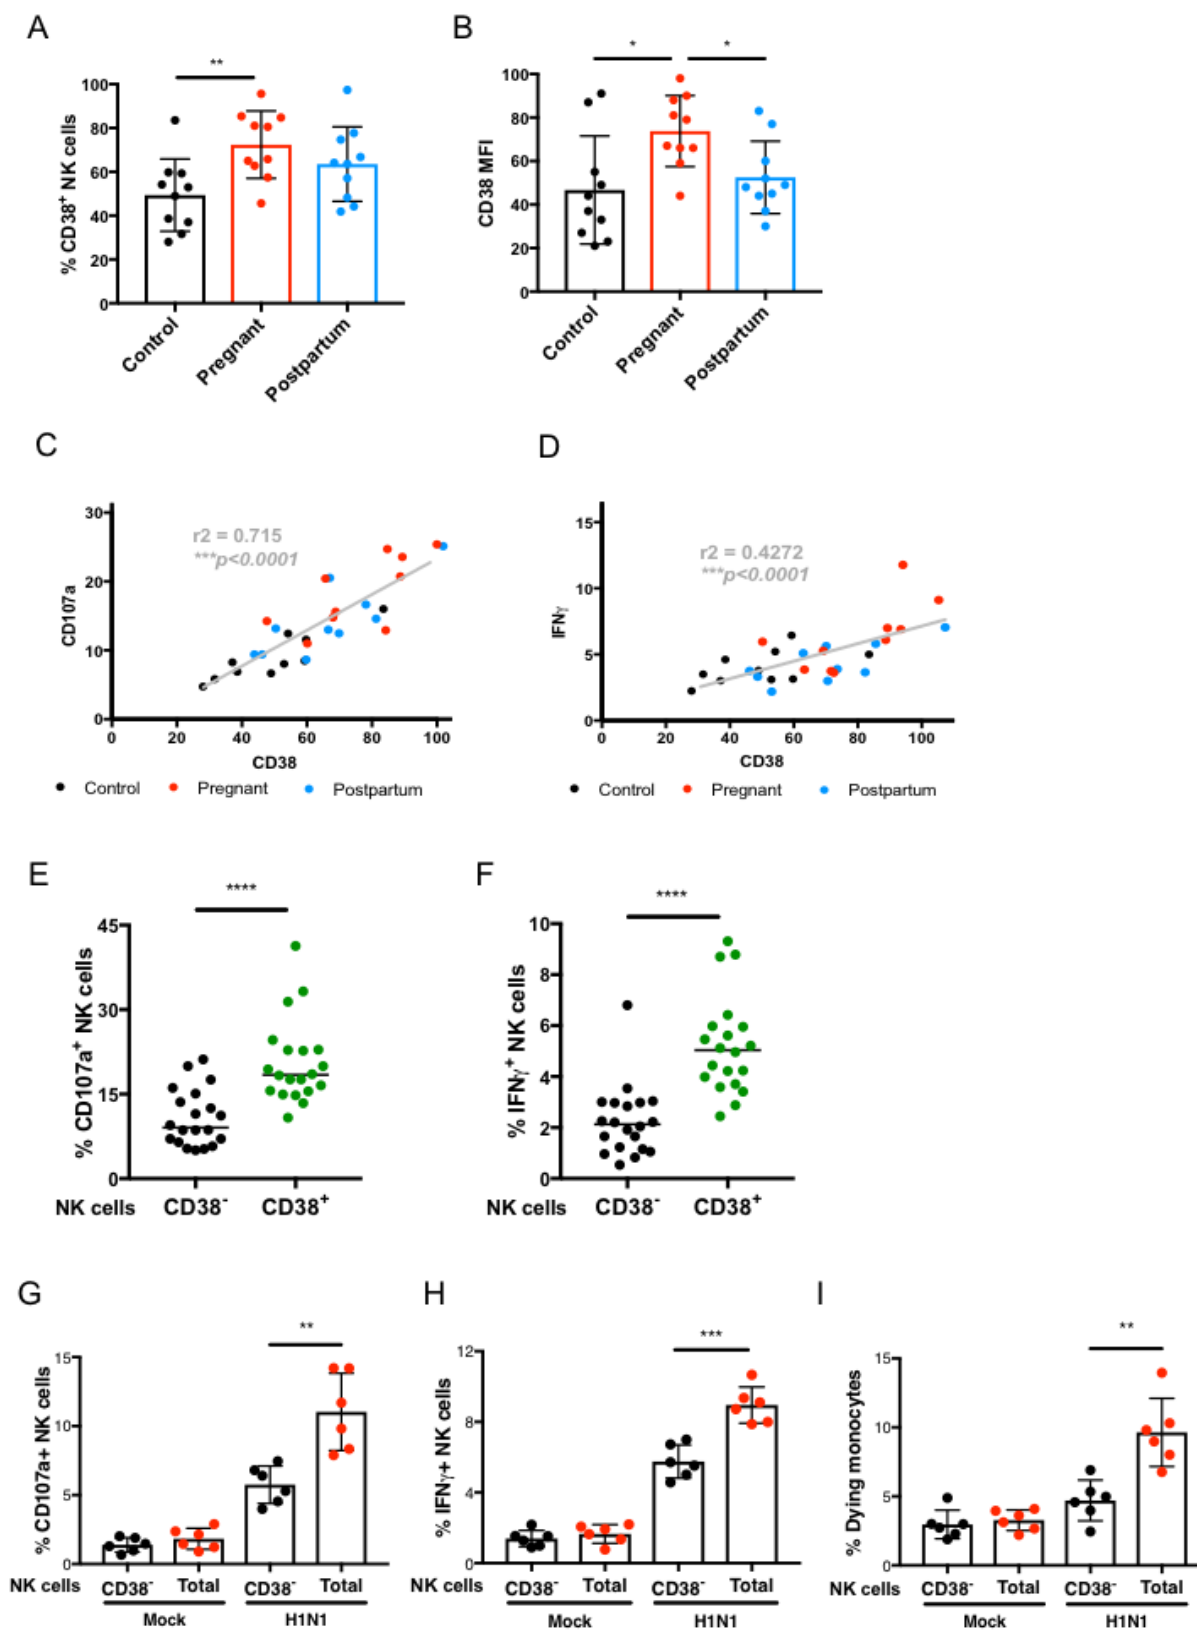

704

705 NK cells and autologous monocytes were sorted from the PBMCs of controls (N=10), pregnant women  
706 (N=10) and postpartum women (N=10). Monocytes were infected by H1N1 influenza virus and exposed to  
707 autologous NK cells for 7h. The frequency of NK cells expressing CD38 (**A**) and the CD38 MFI (**B**) on NK  
708 cells is shown. \*\*P<0.01 (Mann–Whitney *U* Tests to compare controls vs. pregnant). Correlation by linear  
709 regression between CD38 and CD107a expression (**C**) or IFN- $\gamma$  expression (**D**) was determined on NK  
710 cells. (**E**) CD107a expression and (**F**) IFN- $\gamma$  production were measured in CD38<sup>-</sup> and CD38<sup>+</sup> subsets of NK  
711 cells exposed to autologous influenza-infected monocytes. Data from both pregnant and control women  
712 together were analyzed. (**G, H and I**) CD38<sup>-</sup> and total NK cells, and autologous monocytes were isolated  
713 from healthy blood donors (N=6). Monocytes were infected by H1N1 virus and exposed to autologous  
714 CD38<sup>-</sup> or total NK cells for 7h. CD107a expression (**G**) and IFN- $\gamma$  production (**H**) by CD38<sup>-</sup> or total NK  
715 cells were determined by flow cytometry as well as monocyte cell death (**I**) as measured by a viability stain.  
716 \*\*\*\*P<0.0001 (Wilcoxon matched-paired test to compare CD38<sup>-</sup> NK cells vs. CD38<sup>+</sup> NK cells).

717

718 **Figure 4. Deep profiling of CD38<sup>-</sup> and CD38<sup>+</sup> NK cells in control and pregnant women.**

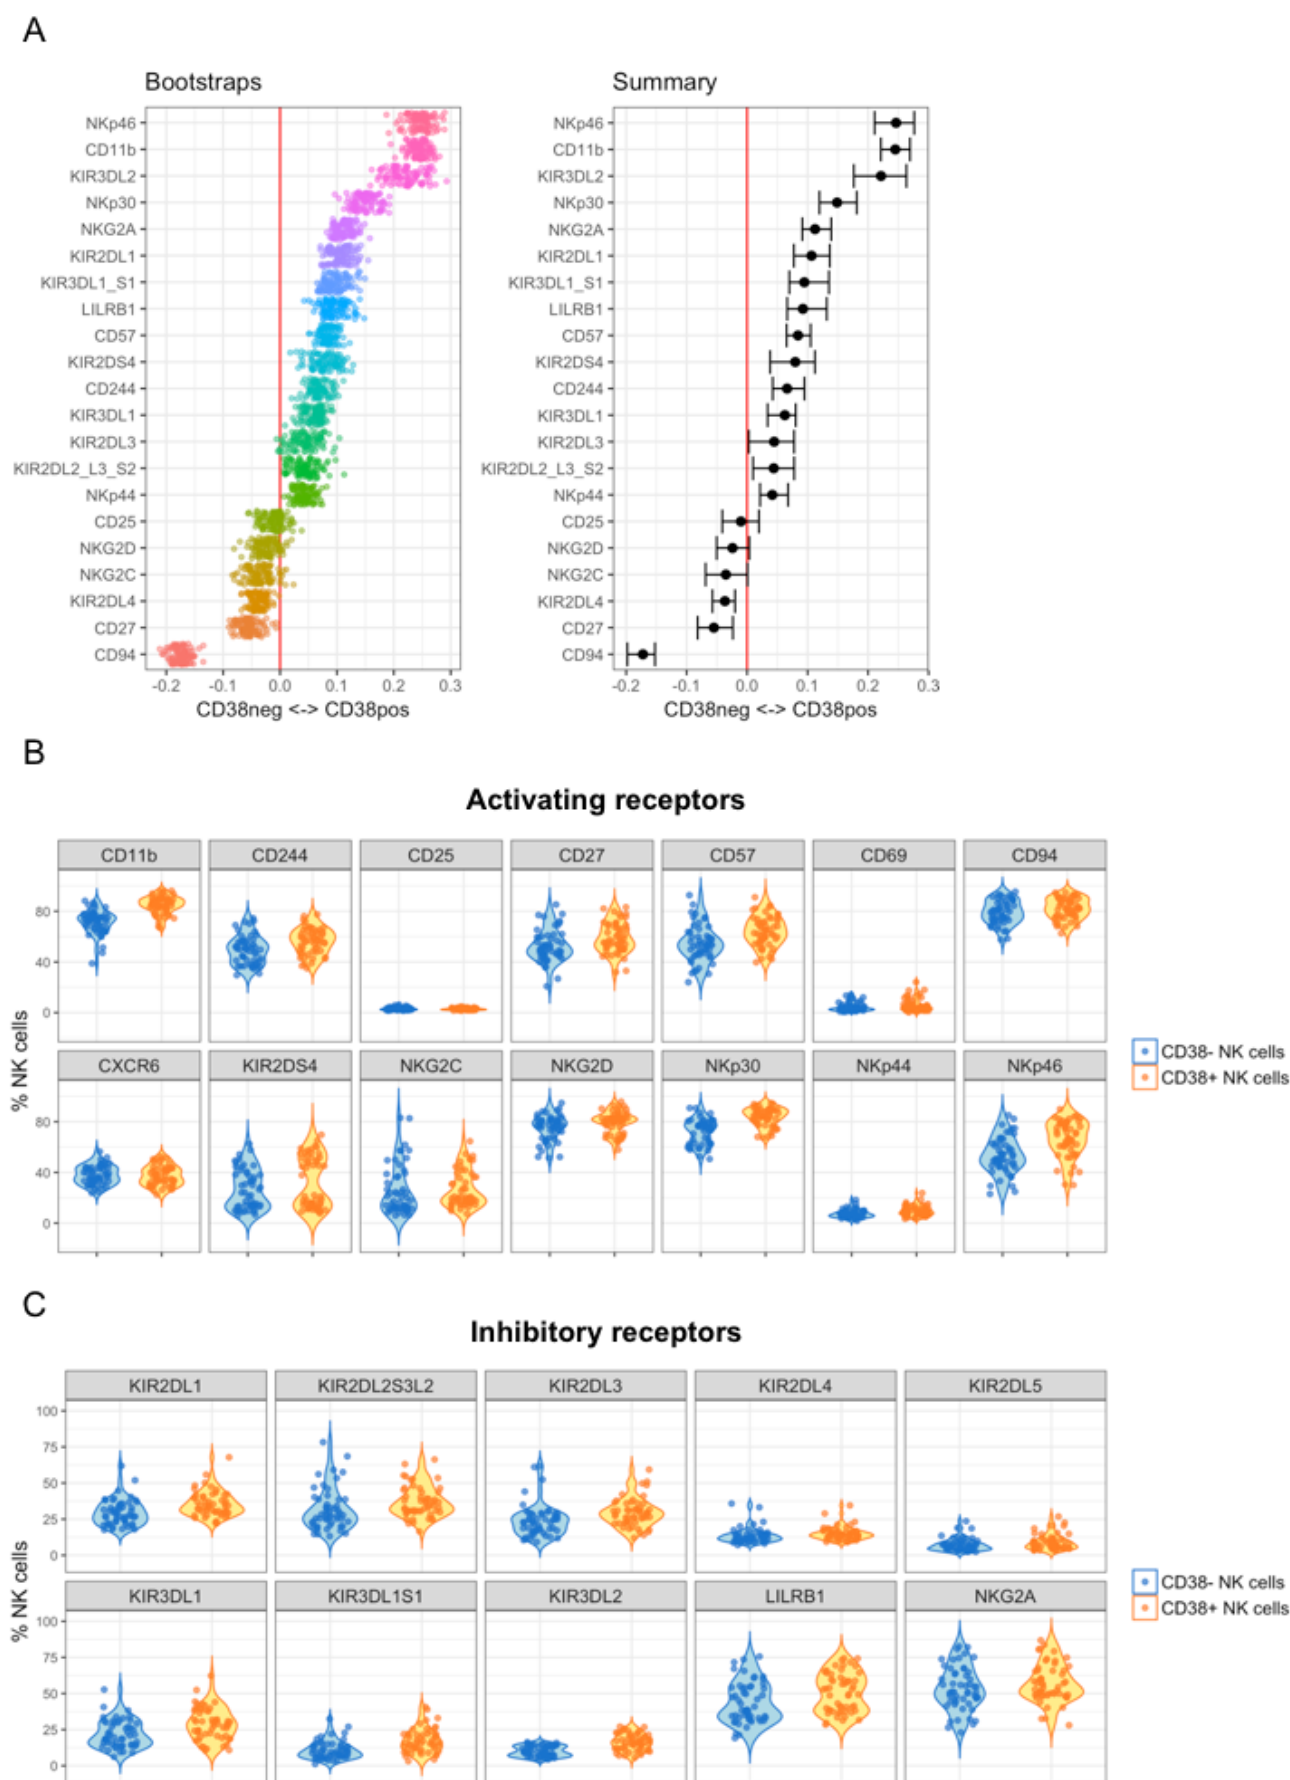

720 PMBCs from controls and pregnant women in cohort 2 were isolated and labeled using a 31-parameter  
721 antibody panel (see Table S3). CD38<sup>-</sup> and CD38<sup>+</sup> NK cells were separated by manual gating and analyzed  
722 using GLM with bootstrap resampling (**A**) and conventional gating strategy for each marker (**B**, for  
723 activating receptor expression, and **C**, for inhibitory receptor expression).

724

725 **Figure 5. CD38 contributes to the immune synapse between NK cells and H1N1-infected cells.**

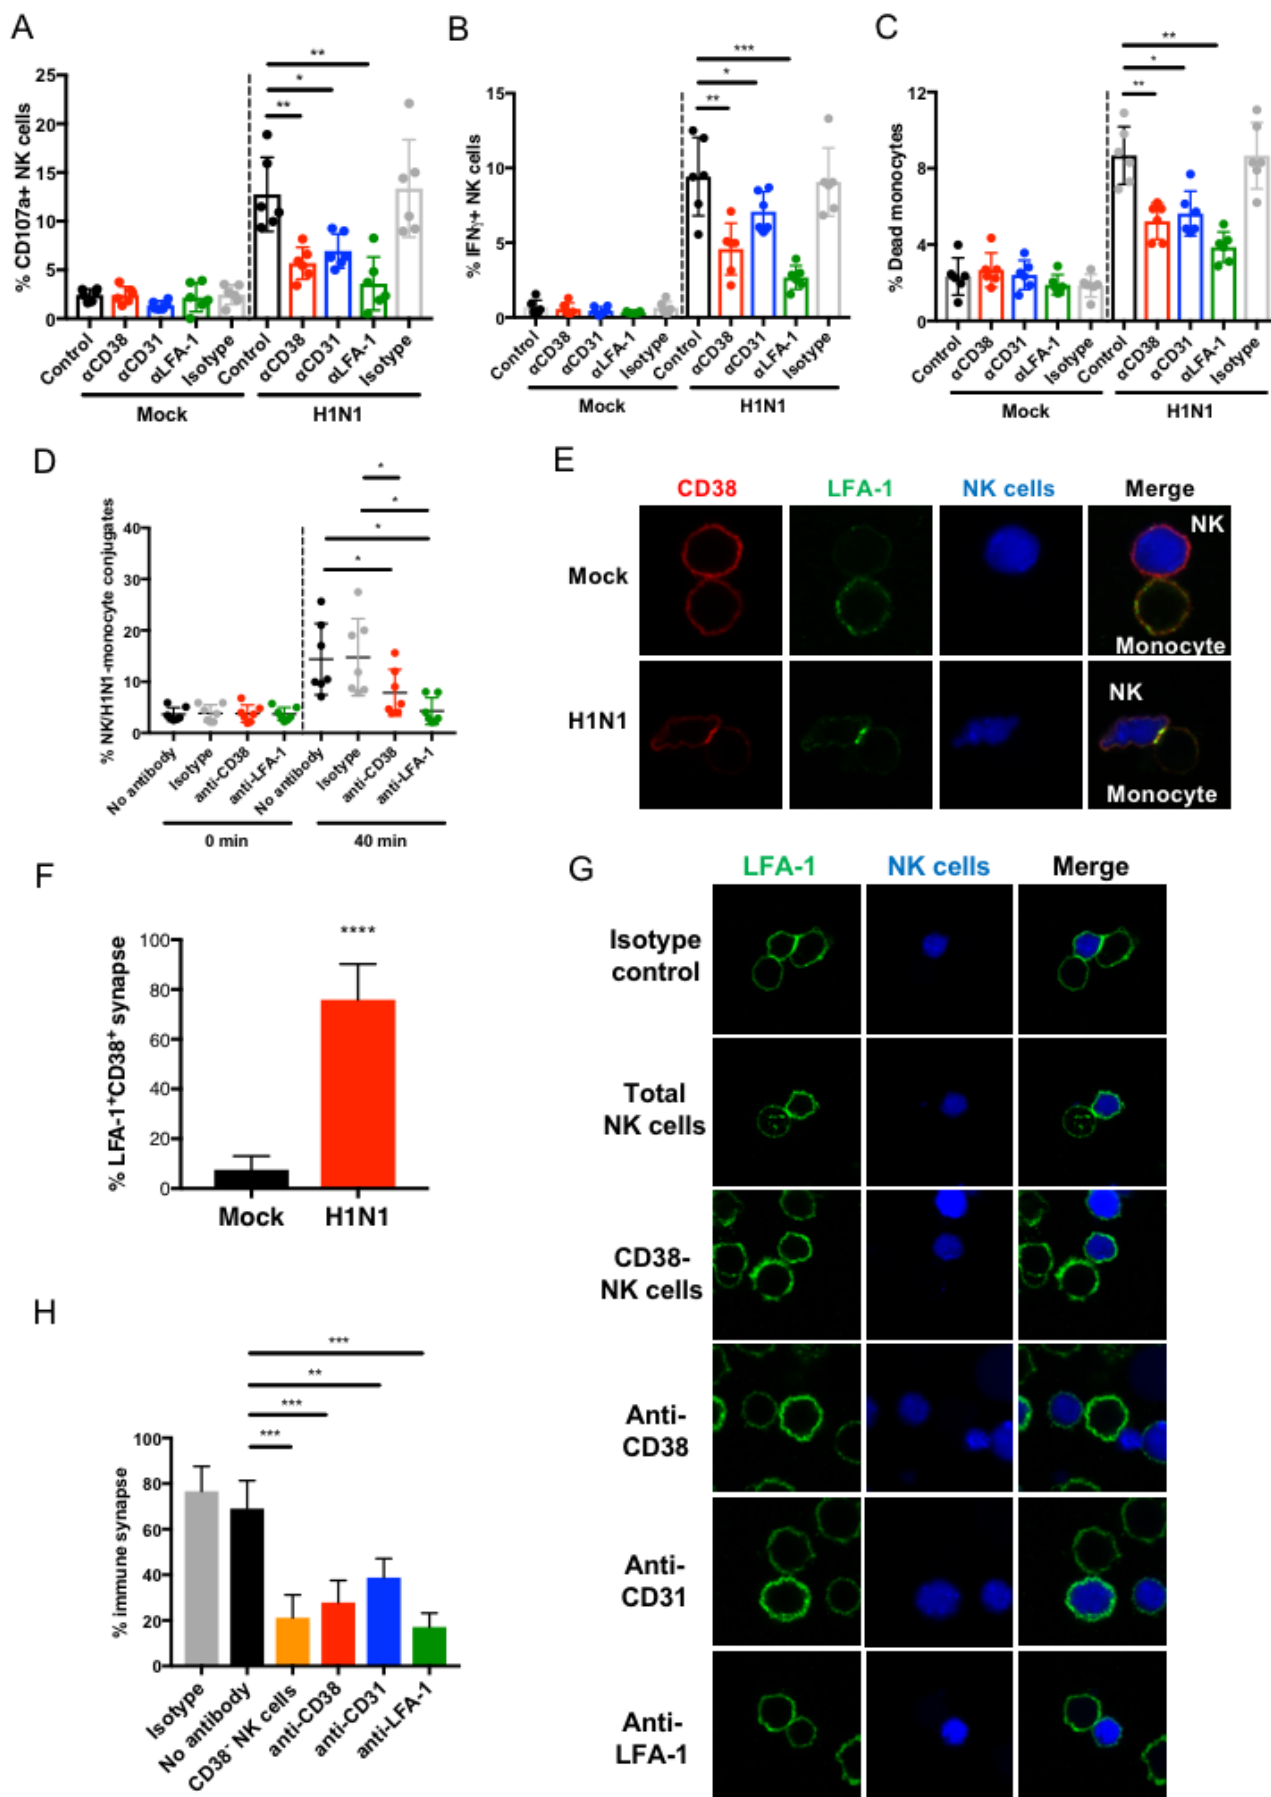

727 **(A to C)** Isolated NK cells from healthy donors (N=6) were exposed to autologous H1N1-infected  
728 monocytes in presence or absence of an isotype control antibody (grey dots) or a CD38 (red dots), CD31  
729 (blue dots) or LFA-1 (green dots) blocking antibody or not (black dots). CD107a expression **(A)**, monocyte  
730 killing **(B)** and IFN- $\gamma$  production **(C)** by NK cells were measured by flow cytometry. \*P<0.05, \*\*P<0.01,  
731 \*\*\*P<0.001 (Wilcoxon matched-paired test). **(D)** Conjugate formation was assessed by labeling NK cells  
732 with and monocytes with Cell Trace Violet. Monocytes were infected with H1N1 influenza and exposed to  
733 autologous NK cells for 0 or 40 min in presence or absence of a CD38 or LFA-1 blocking antibody or an  
734 isotype control antibody. NK cell-monocyte conjugation was determined by the accumulation of the double  
735 positive CFSE<sup>+</sup>Cell Trace Violet<sup>+</sup> population by flow cytometry. \*P<0.05 and \*\*P<0.01 (Wilcoxon  
736 matched-paired test to compare each condition). **(E and F)** Total NK cells and monocytes from healthy  
737 blood donors (N=8) were isolated, monocytes were either mock- or H1N1-infected and exposed to  
738 autologous NK cells. **(E)** CD38 (in red) and LFA-1 (in green) localization was determined by confocal  
739 microscopy. A representative image is depicted for each condition. **(F)** Immune synapse formation was  
740 determined by the accumulation of LFA-1 at the contact zone (N=30) between NK cells (in blue) and mock-  
741 or H1N1-infected monocytes, and CD38 co-localization at the immune synapse was quantified. The  
742 percentage of immune synapses with co-localization is represented based on blinded counting.  
743 \*\*\*\*P<0.0001 (Wilcoxon matched-paired test). **(G and H)** H1N1-infected monocytes were exposed to  
744 CD38<sup>-</sup> NK cells or total NK cells in presence or absence of an isotype control, CD38, CD31 or LFA-1  
745 blocking antibody. The accumulation of LFA-1 (in green) was measured to evaluate the number of immune  
746 synapses **(G)**. A representative image is depicted for each condition. 60 contacts between NK cells and  
747 H1N1-infected monocytes were observed and LFA-1 accumulation was used to identify immune synapse  
748 formation in a blinded fashion **(H)**. The percentage of immune synapse for each condition is represented.  
749 \*\*P<0.01 and \*\*\*P<0.001 (Wilcoxon matched-paired test to compare each condition).  
750



751 **Figure 6. CD38 contributes to immune synapse formation between NK cells and cancer cells.**

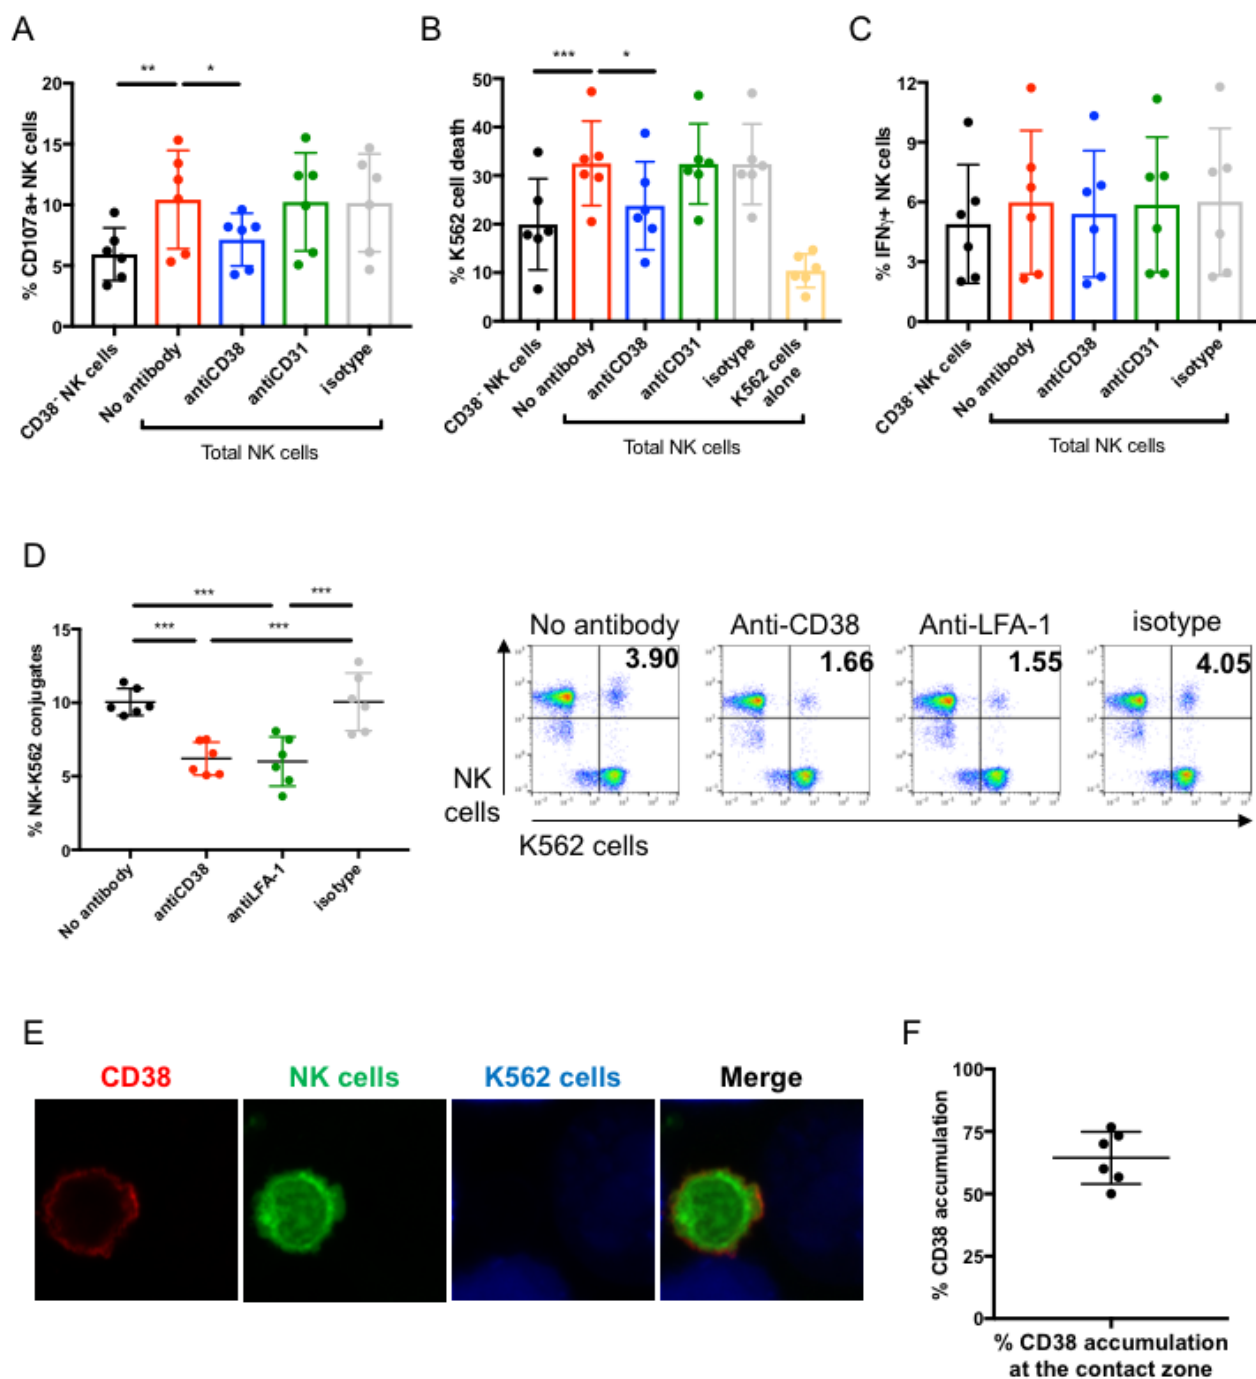

752

753 (A to C) from PBMCs from healthy blood donors (N=6) were collected, CD38<sup>-</sup> or total NK cells were  
 754 sorted, incubated with an isotype control (grey dots), CD38 (blue dots) or CD31 (green dots) blocking  
 755 antibody or without antibody (red dots), and exposed to K562 tumor cells for 4h. CD107a expression (A),  
 756 K562 cell killing (B) and IFN- $\gamma$  production (C) by NK cells was measured by flow cytometry. \*P<0.05,  
 757 \*\*P<0.01, \*\*\*P<0.001 (Wilcoxon matched-paired test). (D) NK cells from 6 healthy donors were isolated

758 and stained with CFSE. In parallel, K562 cells were stained with Cell Trace Violet. NK cells were then  
759 exposed to K562 cells for 0 or 40 min in presence or absence of a CD38 or LFA-1 blocking antibody or an  
760 isotype control antibody. NK cell-K562 cell conjugation was determined by the accumulation of the double  
761 positive CFSE+Cell Trace Violet+ population by flow cytometry. Left graph represents a summary of the  
762 experiment and the right panel shows representative plots from one individual. \*\*\*P<0.001 (Wilcoxon  
763 matched-paired test). **(E and F)** Total NK cells from healthy blood donors (N=6) were isolated and exposed  
764 to K562 tumor cells for 1h. **(E)** CD38 (in red) and LFA-1 (in green) localization was determined by confocal  
765 microscopy. A representative image is depicted for each condition. **(F)** Accumulation of CD38 in 30 contact  
766 zones between NK and K562 cells was determined. The percentage of CD38 accumulation at the contact  
767 zone was determined.

768

769 **Supplemental Materials.**

770 **Figure S1. NK cell gating strategy.**

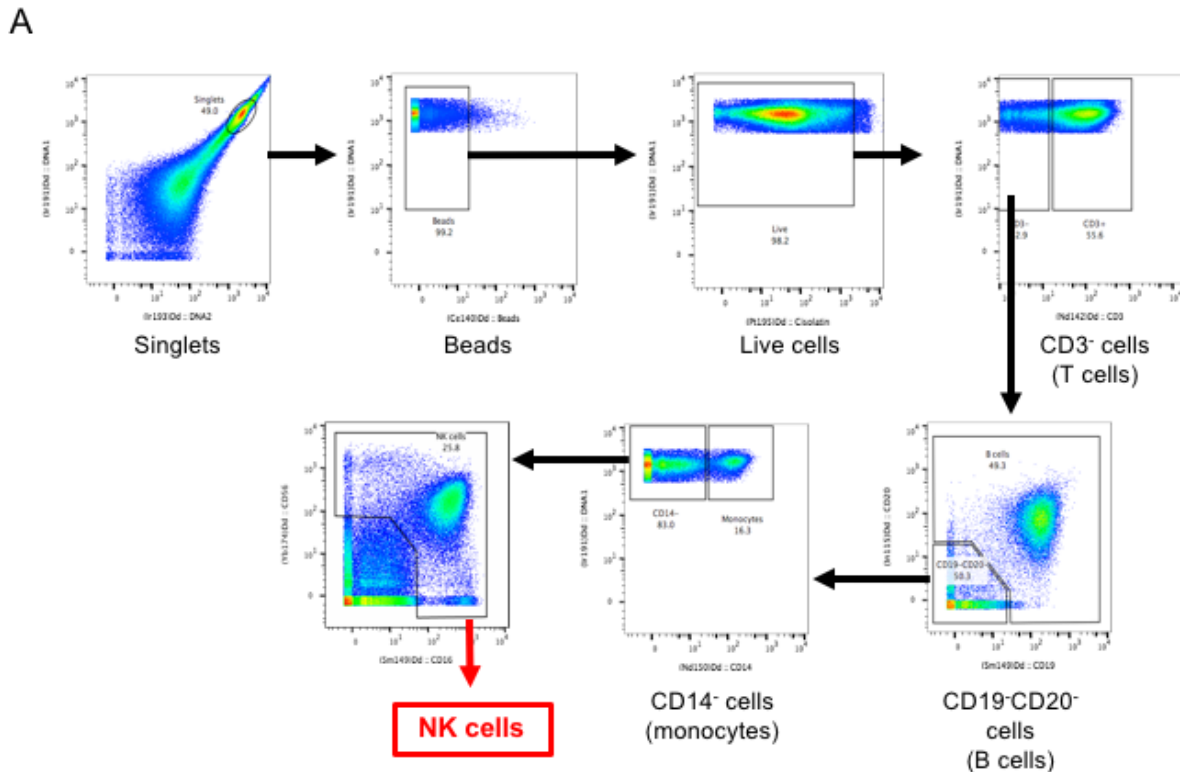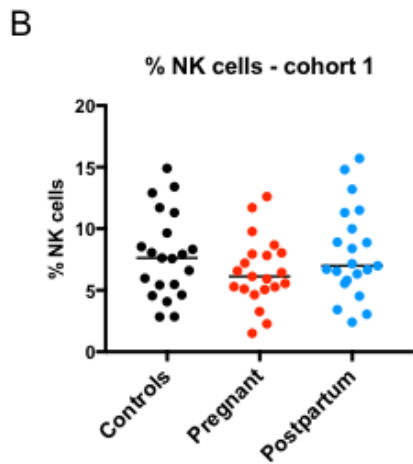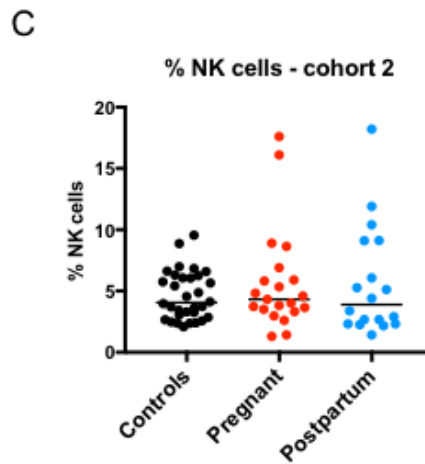

771

772 (A) Two-dimensional mass cytometry plots are shown for a representative patient sample. Gating was  
773 performed using FlowJo software (FlowJo, LLC). Negative lineage gating was performed to exclude CD3+  
774 T cells, CD19+CD20+ B cells and CD14+ monocytes, followed by a positive gating on CD56<sup>+</sup>CD16<sup>+</sup> NK  
775 cells. (B and C) Percentage of NK cells within PBMCs of controls, pregnant women and postpartum in  
776 cohort 1 (B) and cohort 2 (C).

777

778 **Figure S2. CD38 expression in control, pregnant and postpartum women from cohort 1 and 2.**

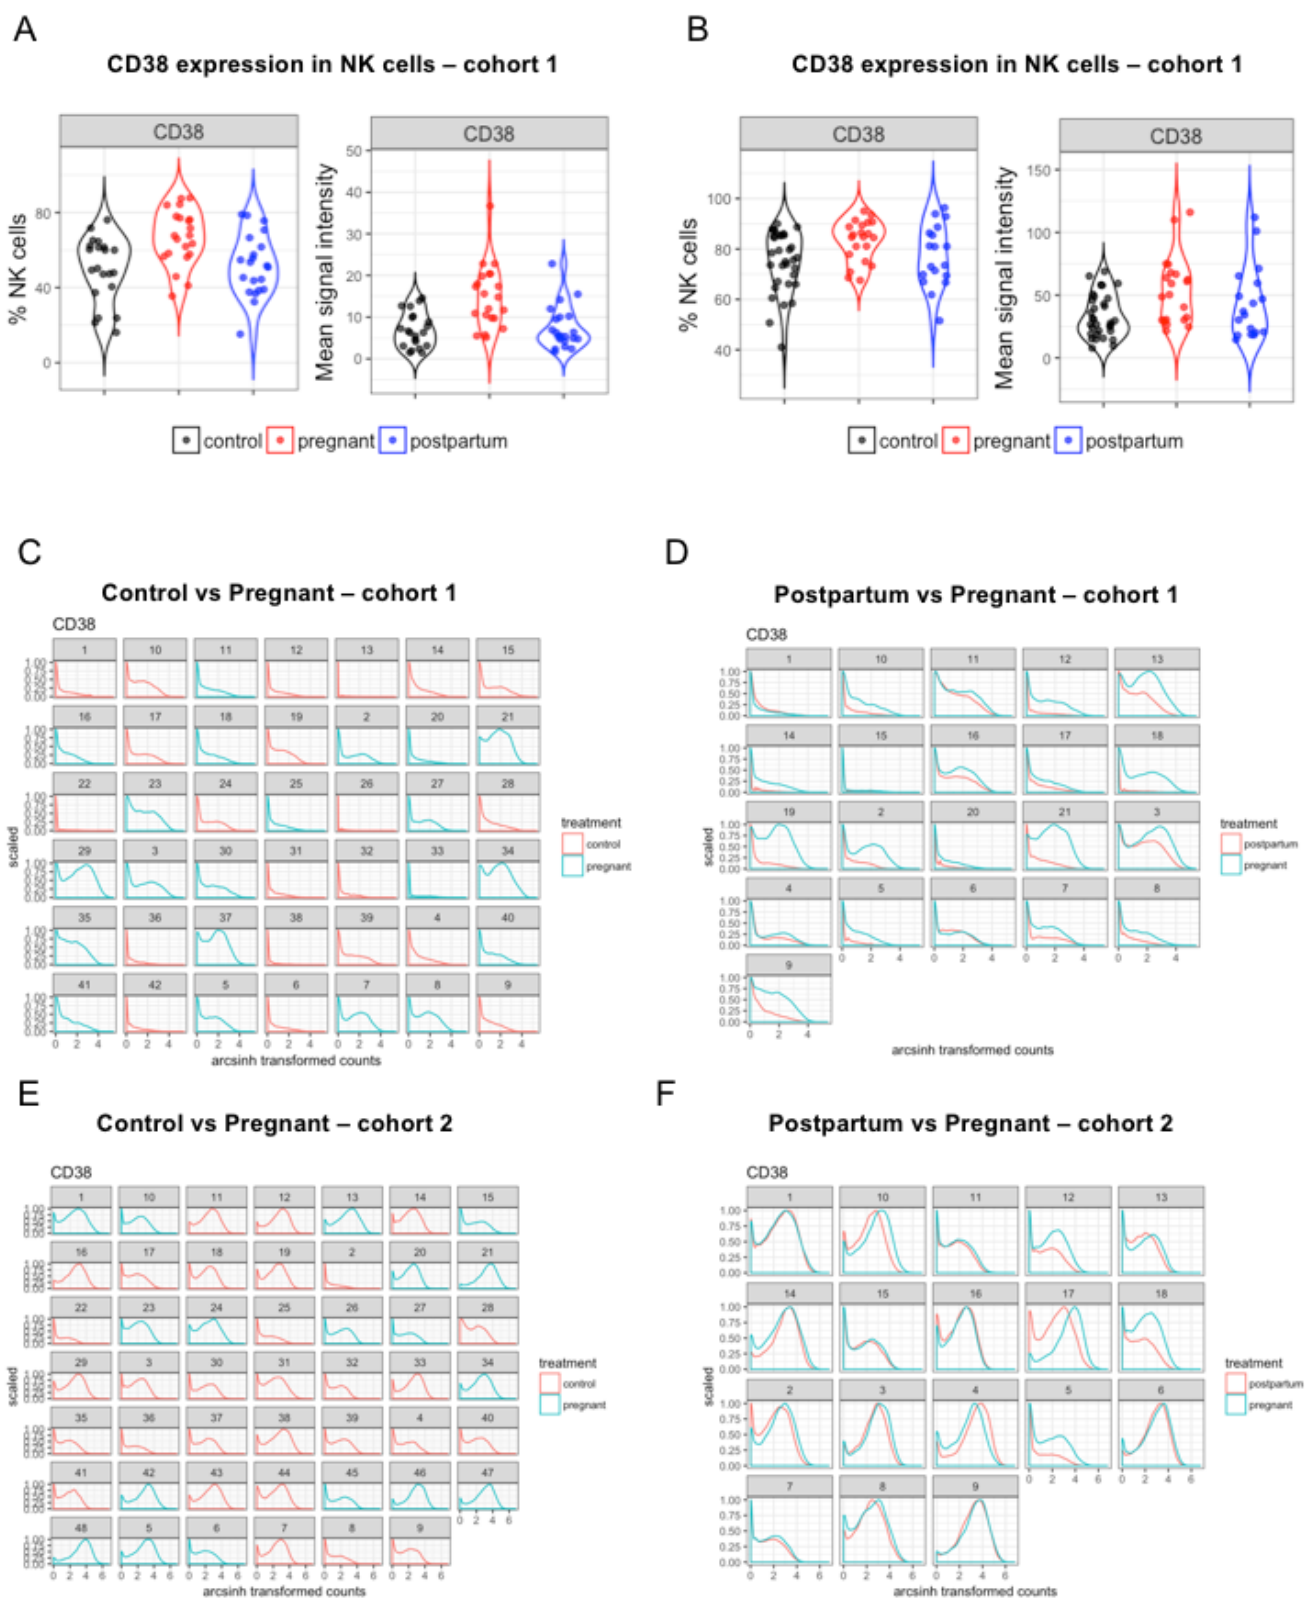

779

780 (A and B) Manual gating for CD38 expression on NK cells in control, pregnant and postpartum women in  
 781 cohort 1 (A) and 2 (B). The left panel represents the percent of CD38<sup>+</sup> NK cells and the right panel represents

782 CD38 mean signal intensity. (**C to F**) NK cells from control and pregnant women (**C**, for cohort 1 and **E**,  
783 for cohort 2), pregnant women and postpartum (**D**, for cohort 1 and **F**, for cohort 2) were analyzed and  
784 expression of CD38 was measured and shown as density plots.

785

786 **Figure S3. Gating strategy for each marker on NK cells from cohort 1.**

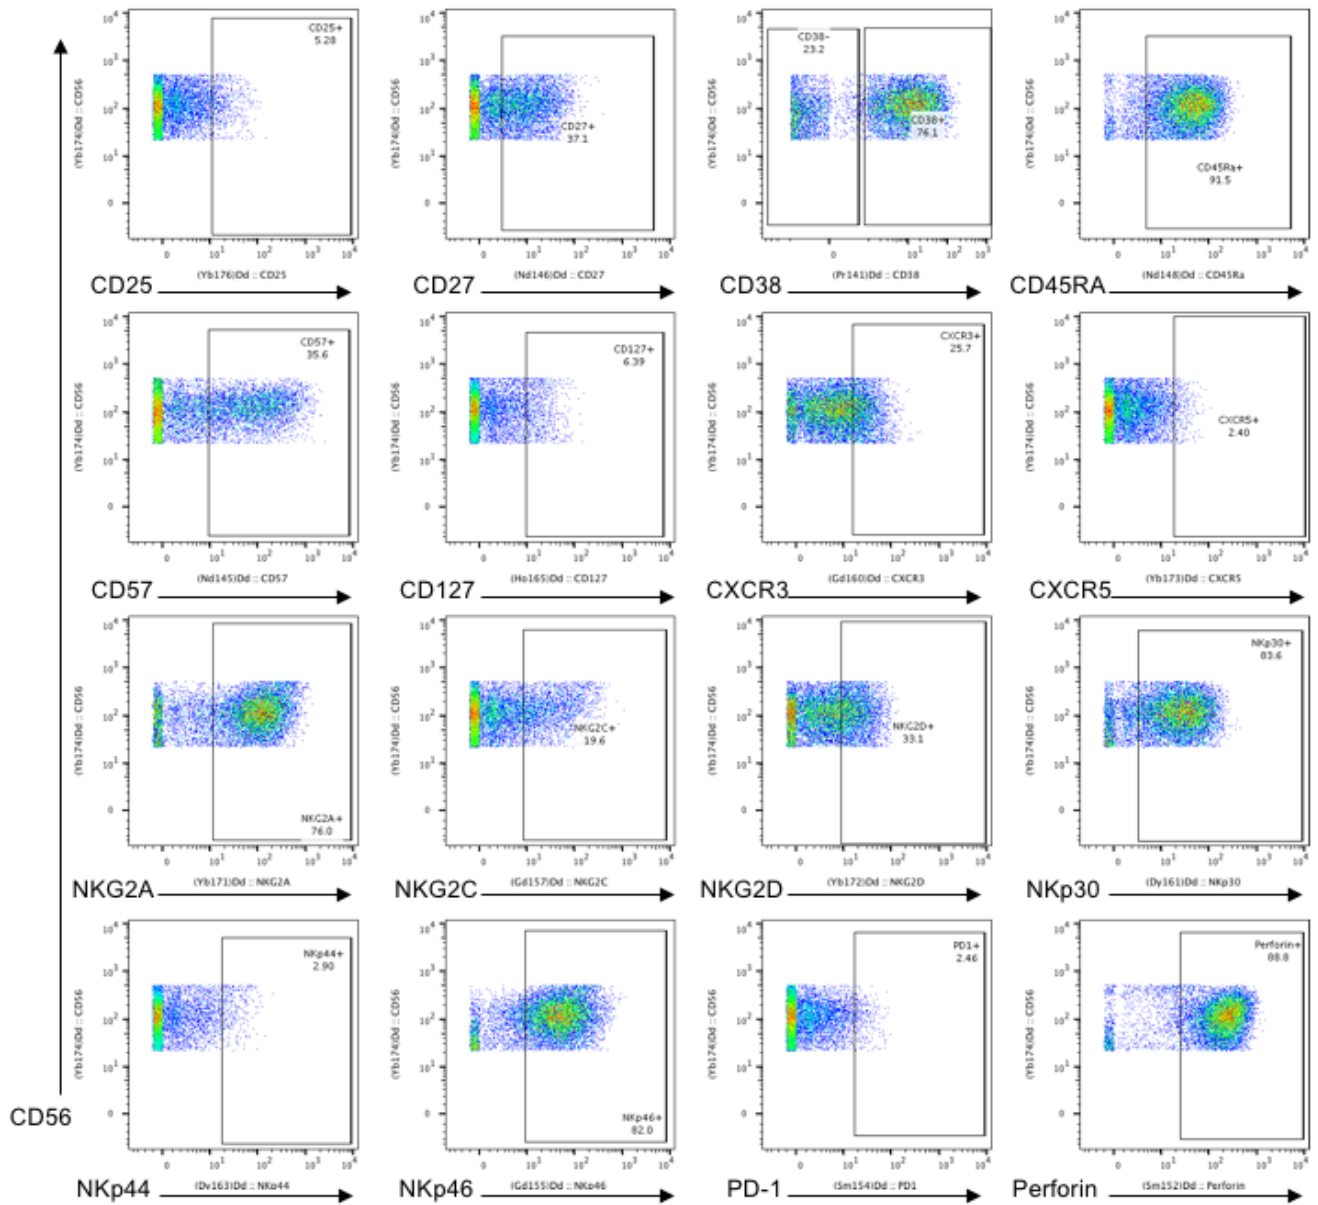

787

788 Representative plots for each marker are shown.

789

790 **Figure S4. Gating strategy for each marker on NK cells from cohort 2.**

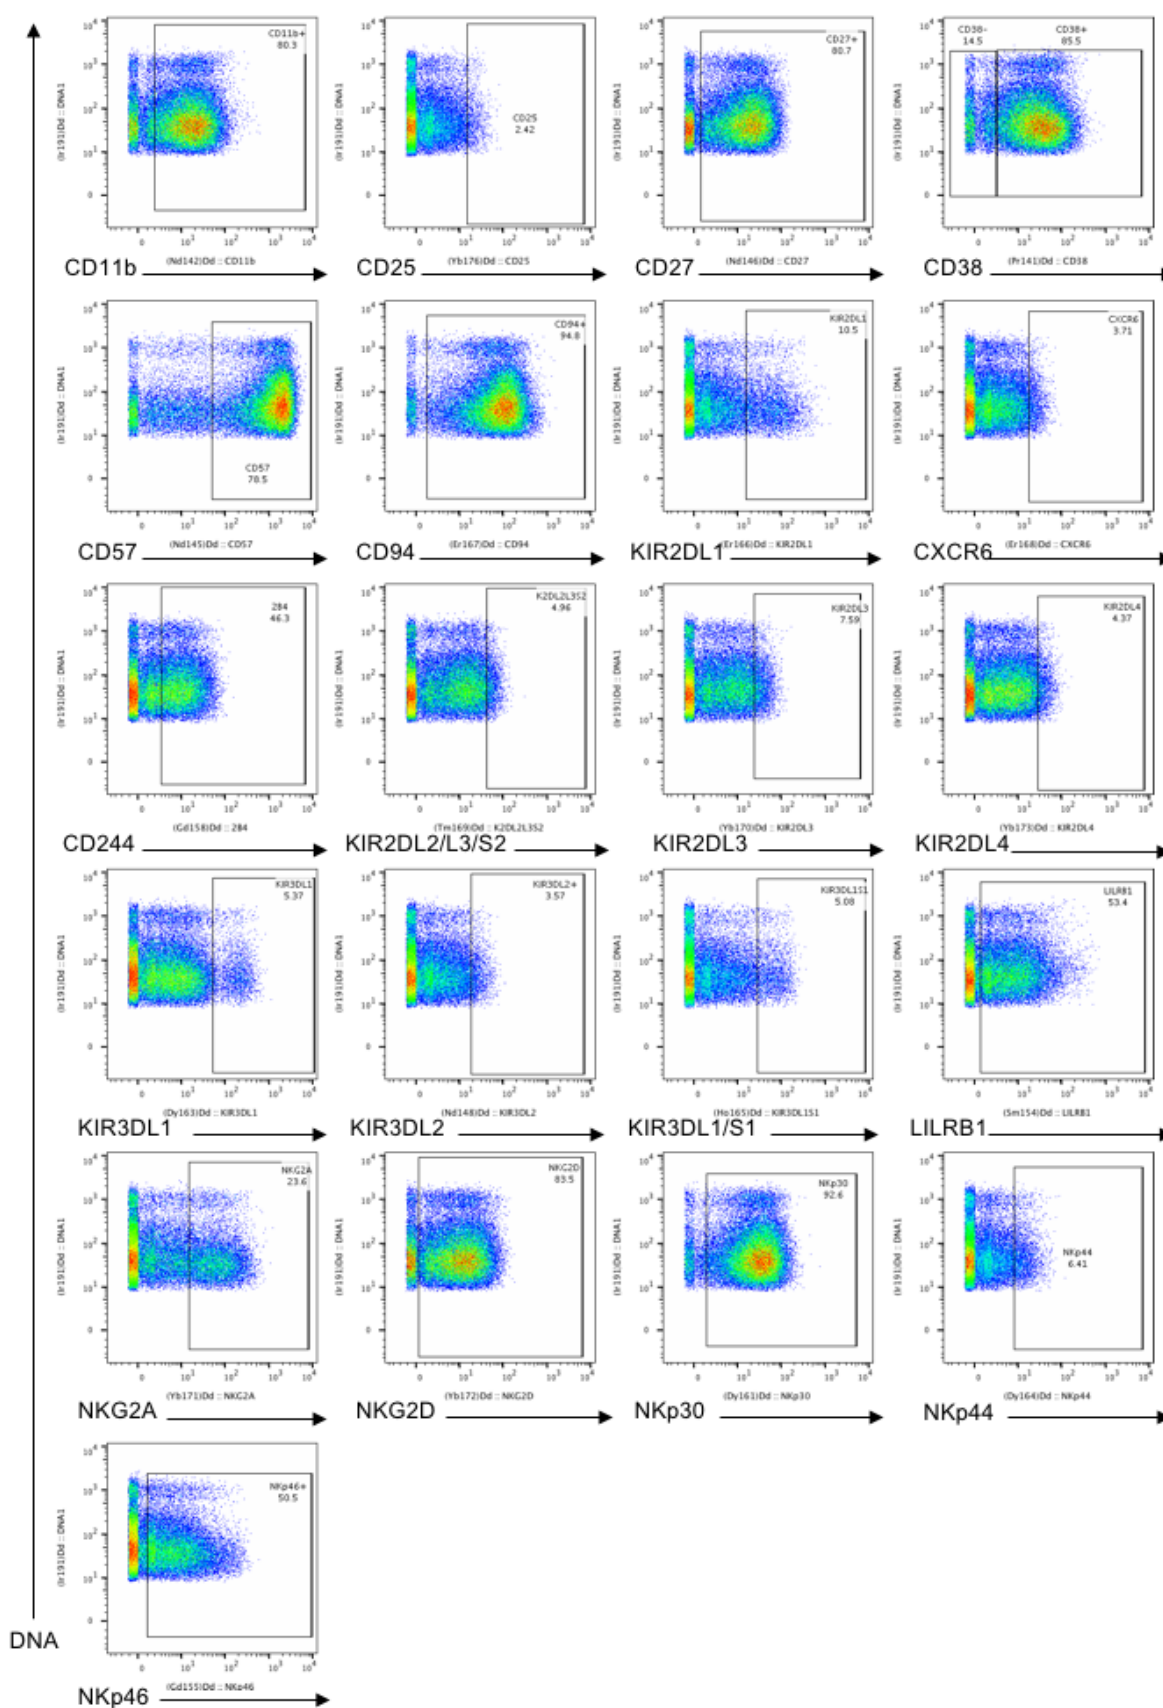

791

792 Representative plots for each marker are shown.



793 **Figure S5. Percentage of expression for each marker on NK cells from cohort 1 and 2 using**  
794 **conventional gating.**

A

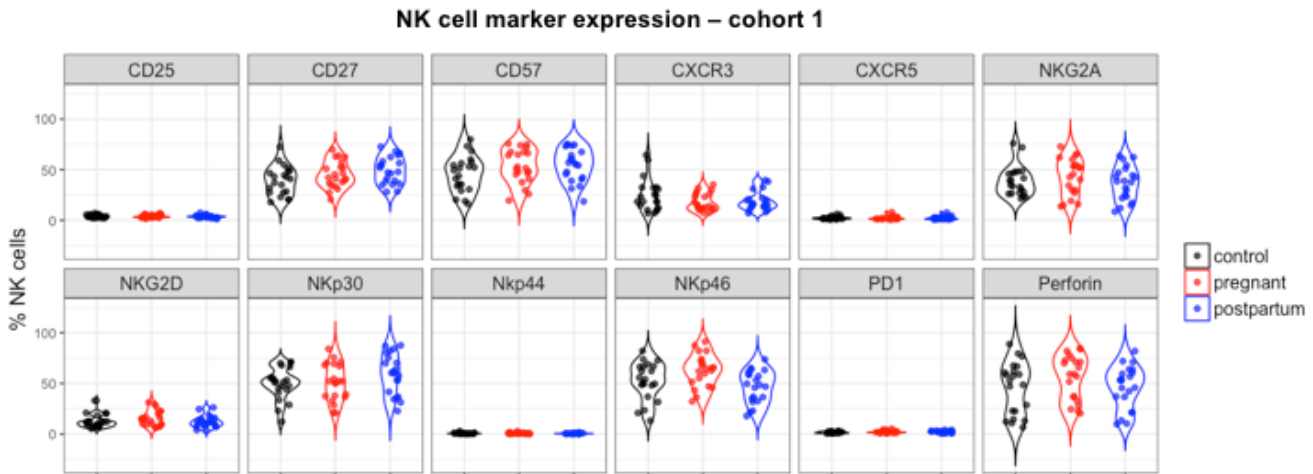

B

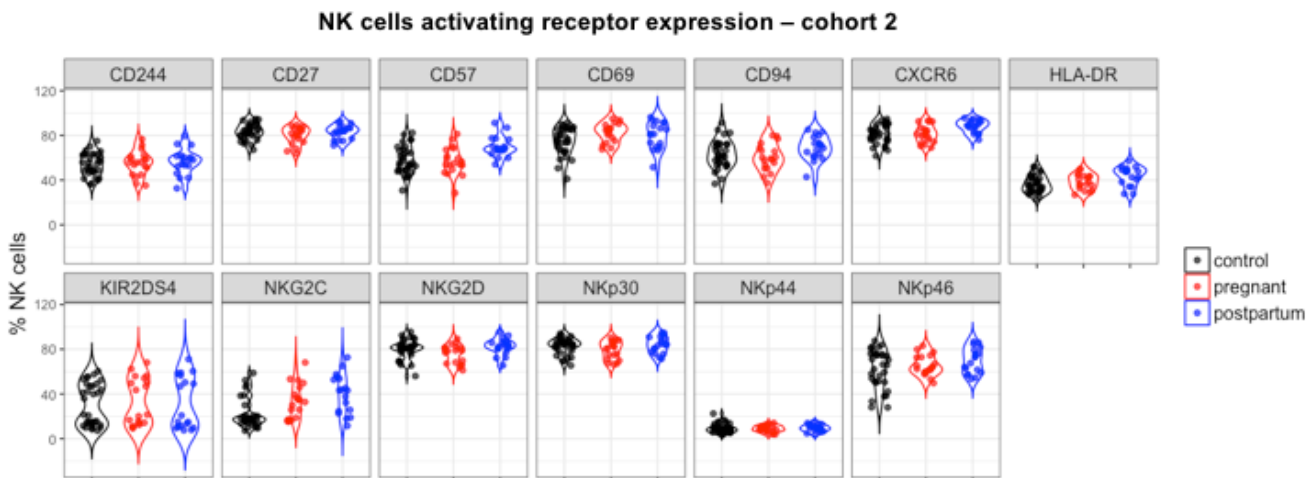

C

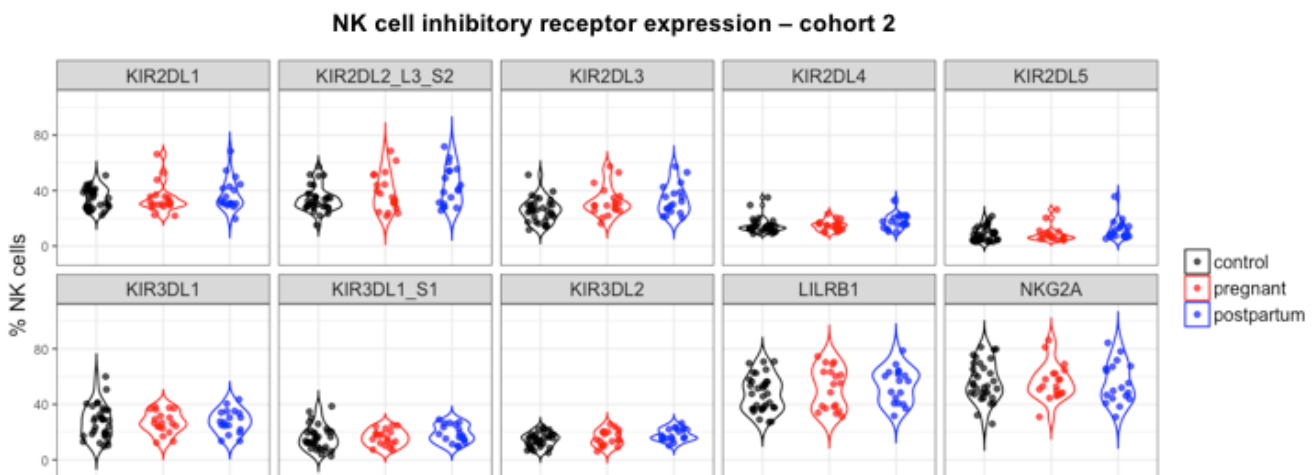

795



796 **(A to C)** NK cells from controls and pregnant women, as well as postpartum on cohort 1 and 2 were isolated  
797 and stained using a 22- or 31 parameter antibody panel, respectively. Percentage of each marker on NK  
798 cells was determined by conventional gating for cohort 1 **(A)** and 2 **(B and C)**.  
799

800 **Figure S6. Mean Signal intensity of NK cell markers in control, pregnant and postpartum from**  
801 **cohort 1 using conventional gating.**

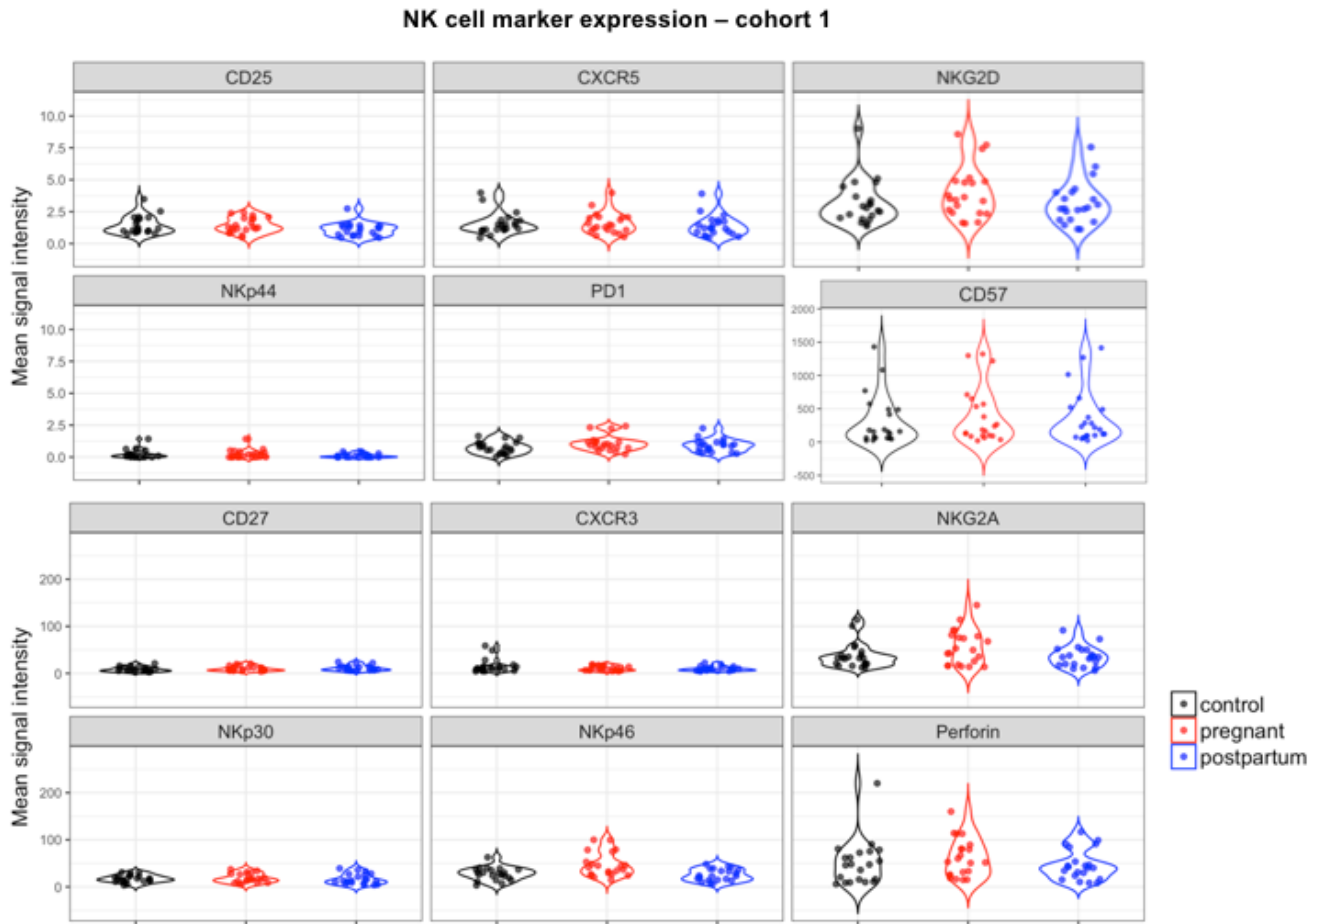

802

803 NK cells from controls, pregnant, and postpartum women from cohort 1 were isolated and stained using a  
804 22-parameter antibody panel. Mean Signal Intensity for each marker was determined by conventional  
805 gating.

806

807 **Figure S7. Mean Signal intensity of NK cell markers in control, pregnant and postpartum from**  
808 **cohort 2 using conventional gating.**

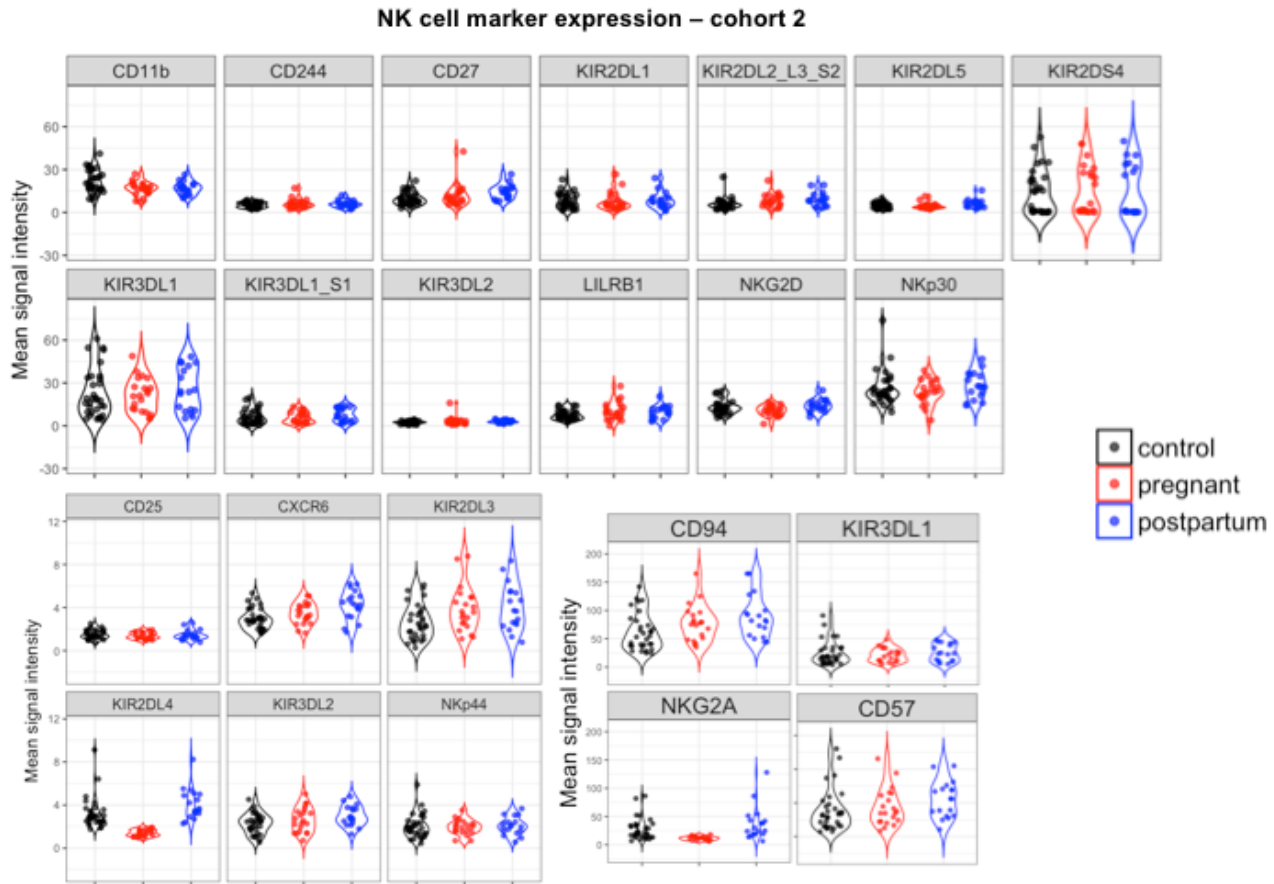

809

810 NK cells from controls, pregnant, and postpartum women in cohort 2 were isolated and stained using a 31-  
811 parameter antibody panel. Mean Signal Intensity for each marker was determined by conventional gating.

812

813 **Figure S8. Comparison of CD38<sup>-</sup> and CD38<sup>+</sup> NK cell expression of each marker in control and**  
814 **pregnant women from cohort 1 using logistic regression model and conventional gating.**

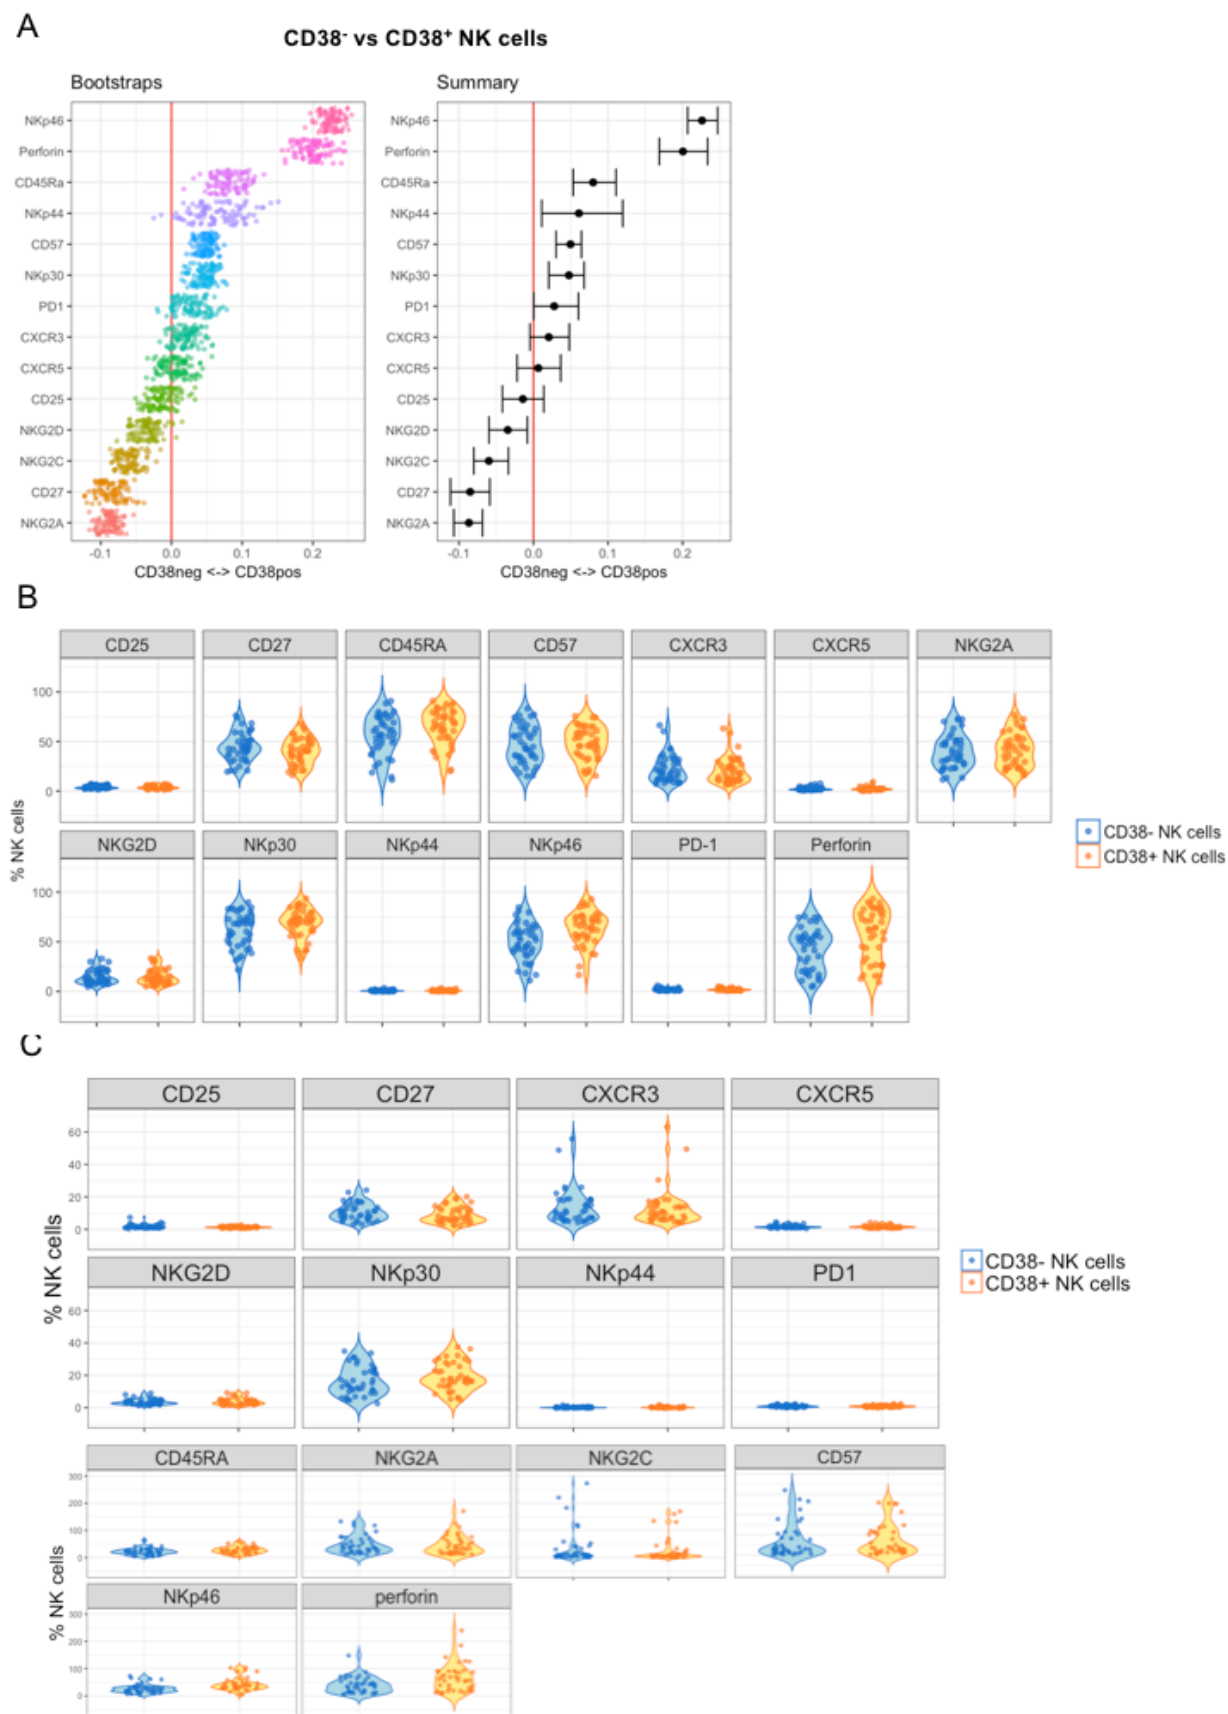

816 (A to C) PBMCs from control and pregnant women in cohort 1 were stained using specific NK cell  
817 antibodies without stimulation and acquired through a mass cytometer. Data from control and pregnant  
818 women were pooled and analyzed using a logistic regression model (A) showing whether each NK cell  
819 marker is predictive of CD38<sup>-</sup> or CD38<sup>+</sup> NK cells. Pooled data were also analyzed by conventional gating  
820 to determine the percentage of (B) and mean signal expression (C) for each marker on CD38<sup>-</sup> or CD38<sup>+</sup> NK  
821 cells.  
822

823 **Figure S9. Comparison of activating and inhibitory receptor expression on CD38<sup>-</sup> and CD38<sup>+</sup> NK**

824 **cells from cohort 2 in control or pregnant women by conventional gating.**

A

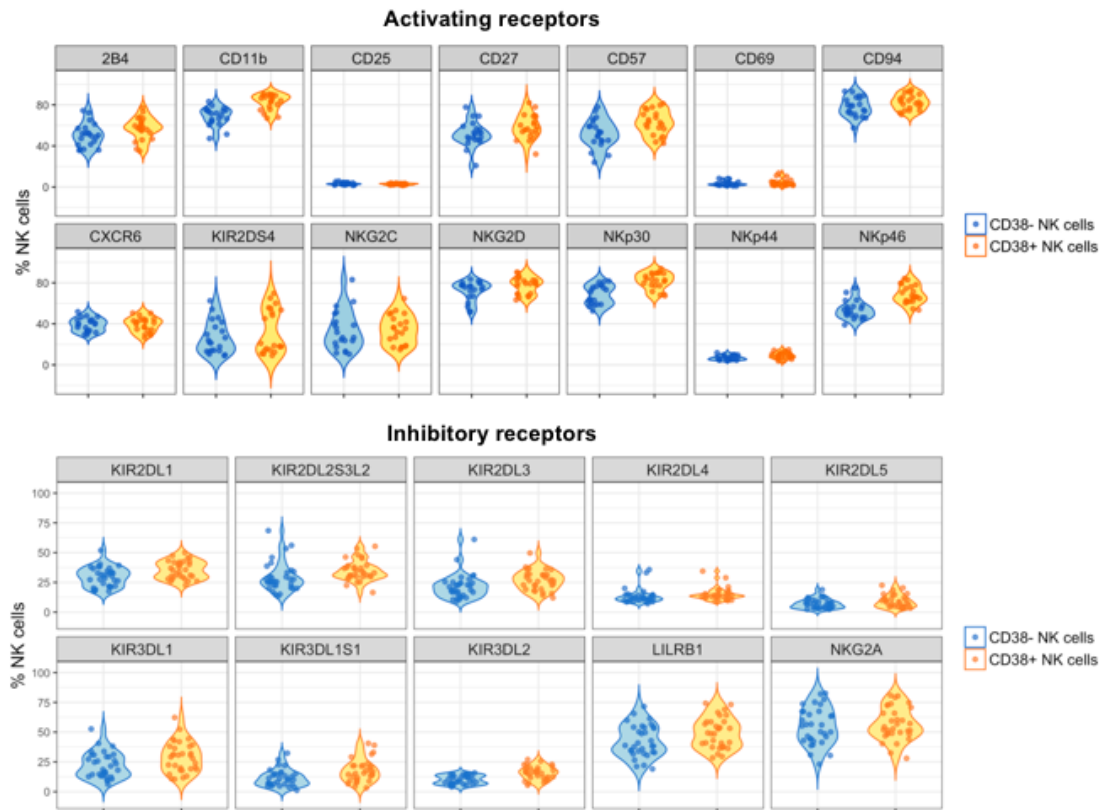

B

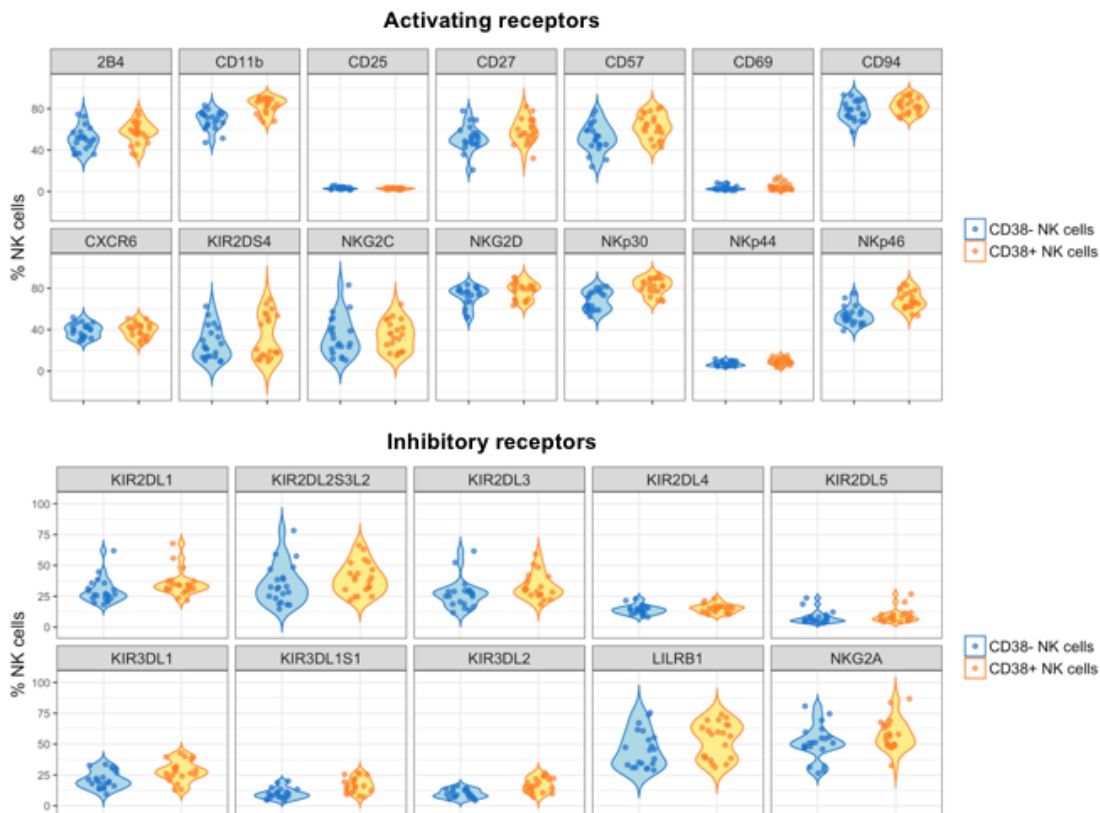

825

826 **(A and B)** PBMCs from control and pregnant women were stained using specific NK cell antibodies  
827 without stimulation and acquired through a mass cytometer. **(A)** Percentage of expression of activating and  
828 inhibitory receptors on CD38<sup>-</sup> and CD38<sup>+</sup> NK cells from control. **(B)** Percentage of expression of activating  
829 and inhibitory receptors on CD38<sup>-</sup> and CD38<sup>+</sup> NK cells from pregnant women.

830

831 **Figure S10. Effect of the CD38 enzyme inhibitor, kuromanin, on the NK cell response to H1N1-**  
832 **infected monocytes.**

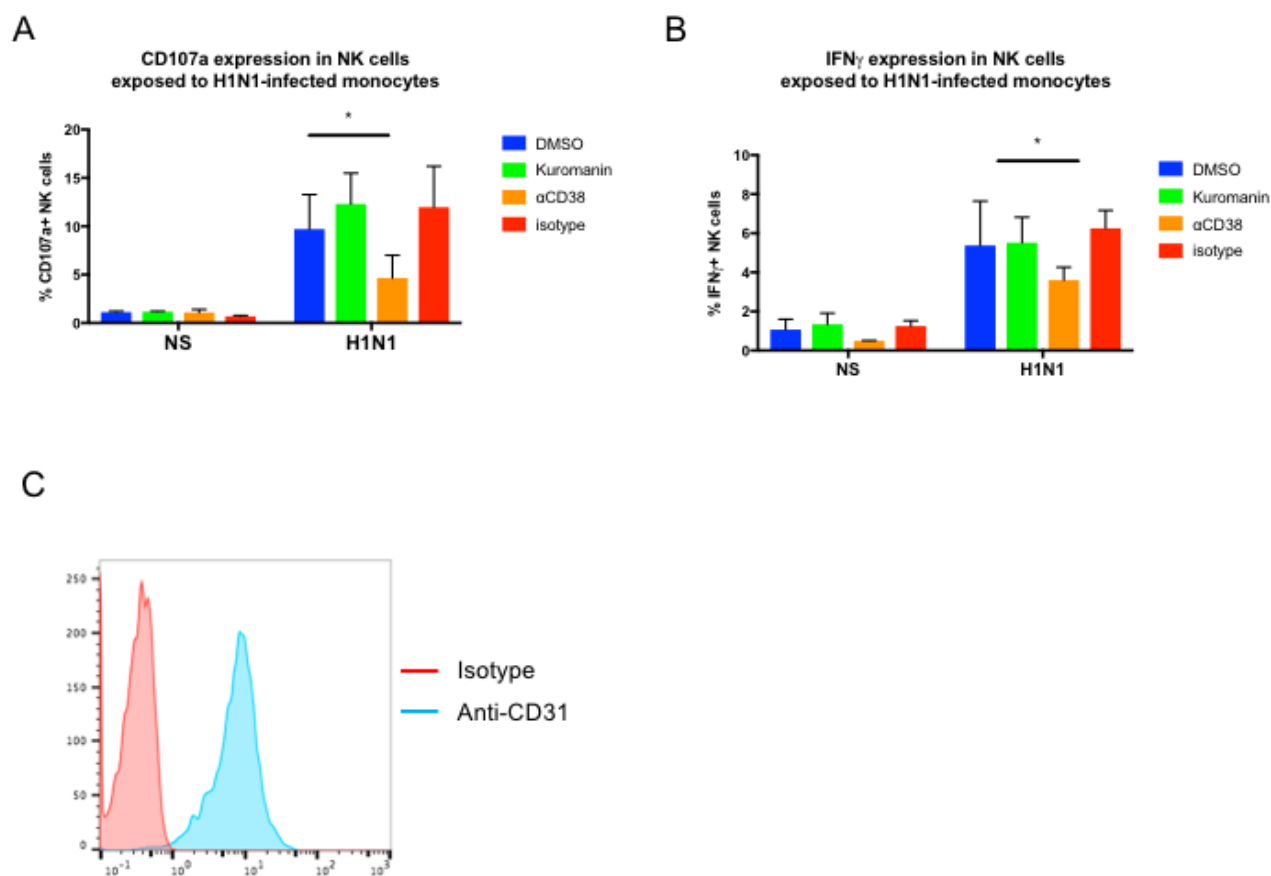

833

834 NK cells and monocytes from healthy blood donors (N=6) were isolated and monocytes were infected by  
835 H1N1 virus. Autologous NK cells were exposed to infected monocytes in presence of isotype or CD38  
836 blocking antibody, or kuromanin. CD107a (**A**) and IFN- $\gamma$  (**B**) expression was then measured by flow  
837 cytometry. (**C**) CD31 measured expression by flow cytometry in non-infected monocytes. \*P<0.05  
838 (Wilcoxon matched-paired test to compare CD38<sup>-</sup> and CD38<sup>+</sup> NK cells).

839



840 **Figure S11. CD38 contributes to NK cell-influenza-infected monocytes conjugation.**

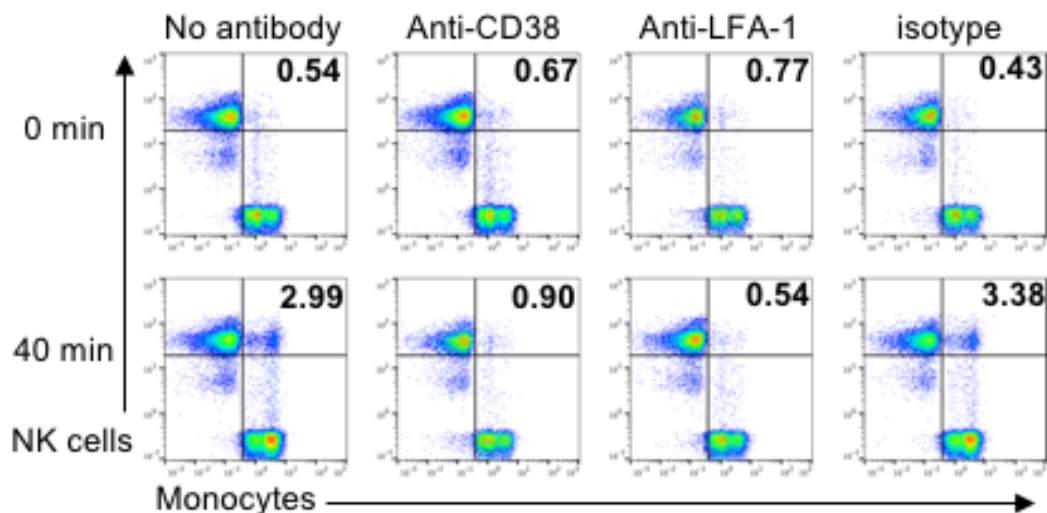

841

842 NK cells and monocytes were isolated from healthy donors (N=6). NK cells and monocytes were stained  
843 with CFSE and Cell Trace Violet, respectively. Monocytes were infected by H1N1 virus. NK cells were  
844 incubated with a CD38 or LFA-1 blocking antibody, an isotype control antibody or no antibody. NK cells  
845 were then exposed to H1N1-infected monocytes for 0 or 40 min. NK cell-monocyte conjugation was  
846 determined by the accumulation of the double positive CFSE<sup>+</sup>CellTrace Violet<sup>+</sup> population by flow  
847 cytometry. Representative plots from an individual are depicted.

848

849 **Table S1.** Demographics for cohort 1.

850

| <b>Characteristic</b>      | <b>Pregnant, n = 21</b> | <b>Control, n=21</b>   |
|----------------------------|-------------------------|------------------------|
| <b>Age, years (median)</b> | <i>30.0 (21 to 42)</i>  | <i>27.2 (19 to 43)</i> |
| <b>White, n (%)</b>        | <i>4 (19)</i>           | <i>11 (52)</i>         |
| <b>Asian, n (%)</b>        | <i>4 (19)</i>           | <i>5 (24)</i>          |
| <b>Hispanic, n (%)</b>     | <i>9 (43)</i>           | <i>3 (14)</i>          |
| <b>Race, other, n (%)</b>  | <i>4 (19)</i>           | <i>1 (5)</i>           |
| <b>Trimester 2, n (%)</b>  | <i>10 (48)</i>          |                        |
| <b>Trimester 3, n (%)</b>  | <i>11 (52)</i>          |                        |

851

852

853

854 **Table S2** Demographics for Cohort 2

855

| <b>Characteristic</b>      | <b>Pregnant, n = 21</b> | <b>Control, n=32</b>   |
|----------------------------|-------------------------|------------------------|
| <b>Age, years (median)</b> | <i>29.2 (19 to 40)</i>  | <i>36.8 (19 to 44)</i> |
| <b>White, n (%)</b>        | <i>4 (19)</i>           | <i>20 (62)</i>         |
| <b>Asian, n (%)</b>        | <i>4 (19)</i>           | <i>6 (18)</i>          |
| <b>Hispanic, n (%)</b>     | <i>9 (43)</i>           | <i>5 (15)</i>          |
| <b>Race, other, n (%)</b>  | <i>4 (19)</i>           | <i>1(3)</i>            |
| <b>Trimester 2, n (%)</b>  | <i>10 (48)</i>          |                        |
| <b>Trimester 3, n (%)</b>  | <i>11 (52)</i>          |                        |

856

857

858 **Table S3.** Antibody panel for mass cytometry in cohort 1.

859

| Isotope | Antigen   | Clone     |
|---------|-----------|-----------|
| 115In   | CD20      | 2H7       |
| 141Pr   | CD38      | HIT2      |
| 142Nd   | CD3       | UCHT1     |
| 145Nd   | CD57      | HCD57     |
| 146Nd   | CD27      | O323      |
| 148Nd   | CD45Ra    | HI100     |
| 149Sm   | CD19      | HIB19     |
| 150Nd   | CD14      | M5E2      |
| 152Sm   | Perforin  | B-D48     |
| 154Sm   | PD1       | EH12.2H7  |
| 155Gd   | NKp46     | 9E2/NKp46 |
| 157Gd   | NKG2C     | 134591    |
| 159Tb   | CD16      | 3G8       |
| 160Gd   | CXCR3     | G025H7    |
| 161Dy   | NKp30     | P30-15    |
| 163Dy   | NKp44     | P44-8     |
| 165Ho   | CD127     | A019D5    |
| 171Yb   | NKG2A     | Z199      |
| 172Yb   | NKG2D     | 1D11      |
| 173Yb   | CXCR5     | 51505     |
| 174Yb   | CD56      | NCAM16.2  |
| 176Yb   | CD25      | M-A251    |
| 191Ir   | DNA1      |           |
| 193Ir   | DNA2      |           |
| 195Pt   | Cisplatin |           |

860

861

862 **Table S4.** Antibody panel for mass cytometry in cohort 2.  
863

| Isotope | Antigen       | Clone     |
|---------|---------------|-----------|
| 115Ln   | CD20          | 2H7       |
| 141Pr   | CD38          | HIT2      |
| 142Nd   | CD11b         | ICRF44    |
| 145Nd   | CD57          | HCD57     |
| 146Nd   | CD27          | O323      |
| 147Sm   | CD127         | A019D5    |
| 149Sm   | CD16          | 3G8       |
| 150Nd   | CD14          | M5E2      |
| 151Eu   | CD19          | HIB19     |
| 152Sm   | CD15          | W6D3      |
| 153Eu   | KIR2DS4       | 179315    |
| 154Gd   | LILRB1        | GHI/75    |
| 155Gd   | NKp46         | 9E2/NKp46 |
| 156Gd   | CD3           | UCHT1     |
| 157Gd   | NKG2C         | 134591    |
| 158Gd   | CD244         | 2-69      |
| 159Tb   | CD33          | WM53      |
| 161Dy   | NKp30         | P30-15    |
| 163Dy   | KIR3DL1       | DX9       |
| 164Dy   | NKp44         | P44-8     |
| 165Ho   | KIR3DL1_S1    | REA168    |
| 166Er   | KIR2DL1       | 143211    |
| 167Er   | CD94          | DX22      |
| 168Er   | CXCR6         | 56811     |
| 169Tm   | KIR2DL2_L3_S2 | DX27      |
| 170Yb   | KIR2DL3       | 180701    |
| 171Yb   | NKG2A         | Z199      |
| 172Yb   | NKG2D         | 1D11      |
| 173Yb   | KIR2DL4       | mAB 33    |
| 174Yb   | CD56          | NCAM16.2  |
| 176Yb   | CD25          | M-A251    |
| 191Ir   | DNA1          |           |
| 193Ir   | DNA2          |           |
| 195Pt   | Cisplatin     |           |

864
